# 1                    **RNA virome diversity and *Wolbachia* infection in** 2                    **individual *Drosophila simulans* flies**

3  
4  
5 Ayda Susana Ortiz-Baez<sup>1</sup>, Mang Shi<sup>1</sup>, Ary A. Hoffmann<sup>2\*</sup>, Edward C. Holmes<sup>1\*</sup>  
6  
7

8 <sup>1</sup>Marie Bashir Institute for Infectious Diseases and Biosecurity, School of Life and  
9 Environmental Sciences and School of Medical Sciences, The University of Sydney, Sydney,  
10 New South Wales 2006, Australia.  
11

12 <sup>2</sup>School of BioSciences, Bio21 Institute, University of Melbourne, Parkville, Victoria 3010,  
13 Australia.  
14  
15

## 16 **\*Corresponding author:**

17 Edward C. Holmes

18 Marie Bashir Institute for Infectious Diseases and Biosecurity, School of Life and  
19 Environmental Sciences and School of Medical Sciences, The University of Sydney, Sydney,  
20 New South Wales 2006, Australia.

21 Email: [edward.holmes@sydney.edu.au](mailto:edward.holmes@sydney.edu.au)  
22

## 23 **Keywords**

24 *Drosophila simulans*, *Wolbachia*, RNA virome, evolution, phylogeny, meta-transcriptomics

25 **Abstract**

26 The endosymbiont bacterium *Wolbachia* is associated with multiple mutualistic effects on  
27 insect biology, including nutritional and antiviral properties. *Wolbachia* naturally occurs in  
28 *Drosophila* fly species, providing an operational model host to study how virome  
29 composition may be impacted by its presence. *Drosophila simulans* populations can carry a  
30 variety of *Wolbachia* strains. In particular, the *wAu* strain of *Wolbachia* has been associated  
31 with strong antiviral protection under experimental conditions. We used *D. simulans* sampled  
32 from the Perth Hills, Western Australia, to investigate the potential virus protective effect of  
33 the *wAu* strain on individual wild-caught flies. Our data revealed no appreciable variation in  
34 virus composition and abundance between *Wolbachia* infected/uninfected individuals  
35 associated with the presence/absence of *wAu*. However, it remains unclear whether *wAu*  
36 might impact viral infection and host survival by increasing tolerance rather than inducing  
37 complete resistance. These data also provide new insights into the natural virome diversity of  
38 *D. simulans*. Despite the small number of individuals sampled, we identified a repertoire of  
39 RNA viruses, including Nora virus, Galbut virus, Chaq virus, Thika virus and La Jolla virus,  
40 that have been identified in other *Drosophila* species. In addition, we identified five novel  
41 viruses from the families *Reoviridae*, *Tombusviridae*, *Mitoviridae* and *Bunyaviridae*. Overall,  
42 this study highlights the complex interaction between *Wolbachia* and RNA virus infections  
43 and provides a baseline description of the natural virome of *D. simulans*.

## 44 Introduction

45 The alpha-proteobacterium *Wolbachia* (order *Rickettsiales*) is a widespread endosymbiont of  
46 arthropods and nematodes (i.e. filarial and plant-parasitic nematodes), that can establish  
47 interactions with their hosts ranging from parasitic to mutualistic [1,2]. The genetic diversity  
48 of *Wolbachia* is substantial and currently represented by 11 distinctive supergroups (denoted  
49 A-J), although the majority of *Wolbachia* strains belong to supergroups A and B [3] that are  
50 estimated to have diverged around 50 million years ago [4]. Although these bacteria are  
51 commonly found in reproductive tissues and the germline of their hosts, they have also been  
52 found in somatic tissues such as the brain, salivary glands and gut [5–9], such that  
53 understanding infection dynamics in detail is not a trivial matter [7]. *Wolbachia* primarily  
54 spread by vertical inheritance through transovarian transmission. However, the presence of  
55 *Wolbachia* in a diverse range of host species suggests that horizontal transmission, likely  
56 through antagonistic interactions (i.e. herbivory, parasitism and predation), also contributes to  
57 the dissemination of the bacteria in nature [4,10].

58 The occurrence of *Wolbachia* bacteria in insects is often associated with their ability  
59 to manipulate host reproductive mechanisms and induce a range of alterations, including  
60 parthenogenesis, feminization, cytoplasmic incompatibility and sex-ratio distortion [11].  
61 Among these, cytoplasmic incompatibility is the most common phenotypic effect, and as  
62 such represents an appealing approach for vector population control. In this case, embryonic  
63 lethality is contingent on the infection status and the strain type harboured by males and  
64 females [2]. In addition, the study of *Wolbachia*-host interactions has revealed a variety of  
65 mutualistic effects on host biology [1,12]. For instance, in filarial nematodes and the  
66 parasitoid wasp *Asobara tabida*, the presence of some *Wolbachia* strains has been positively  
67 associated with developmental processes, fertility and host viability [12–14]. Furthermore,  
68 nutritional mutualism between *Wolbachia* and the bedbug *Cimex lectularius* as well as  
69 *Wolbachia*-infected planthoppers, has been suggested as a means to explain B vitamin  
70 supplementation [15–17].

71 Arguably the most important outcome of *Wolbachia* infection in insects is its potential  
72 for virus-blocking, which also provides a basis for intervention strategies based on the control  
73 of arbovirus transmission. This seemingly antiviral effect of *Wolbachia* has been well  
74 documented in some species of insects, including flies and mosquitoes. A striking example  
75 involves the transinfection of *Aedes aegypti* mosquitoes with the *Wolbachia* strain infecting  
76 *Drosophila melanogaster* (*wMel*). *A. aegypti* is the primary vector of a number of important

77 arboviruses, including Dengue (DENV), Zika (ZIKV) and Chikungunya virus (CHIKV), and  
78 the establishment of the wMel strain in wild mosquito populations represents a powerful and  
79 promising approach to decrease virus transmission [18,19]. Although the underlying  
80 mechanisms remain to be fully determined, it has been suggested that *Wolbachia* can modify  
81 the host environment or boost basal immunity to viruses by pre-stimulating the immune  
82 response of their hosts [20]. Potential antiviral mechanisms impacted by *Wolbachia* include  
83 gene expression of the Toll pathway, RNA interference, and modification of the host  
84 oxidative environment that likely trigger an antiviral immune response and hence limit  
85 infection [20–22].

86 Unlike *A. aegypti* mosquitoes, *Wolbachia* naturally occur in *Drosophila* species,  
87 providing a valuable model system to study *Wolbachia*-related virus protection [23,24].  
88 Natural populations of *Drosophila* can carry a diverse array of insect-specific viruses  
89 belonging to the families *Picornaviridae*, *Dicistroviridae*, *Bunyaviridae*, *Reoviridae* and  
90 *Iflaviridae* amongst others [25]. The co-occurrence of *Wolbachia* in *D. melanogaster* has  
91 been associated with increased survival and different levels of resistance to laboratory viral  
92 infections in fly stocks under experimental conditions [23,26]. For example, *Wolbachia*-  
93 infected flies containing the dicistrovirus *Drosophila C virus* (DCV) showed a delay in  
94 mortality compared to *Wolbachia*-free flies [26]. In contrast, other studies found no or limited  
95 effect of *Wolbachia* on viral protection, as well as on virus prevalence and abundance in  
96 field-collected flies [25,27]. Such contrasting data emphasize the need of further research  
97 efforts to characterize the effect of *Wolbachia* strains on virus composition in *Drosophila* in  
98 nature.

99 Although the origin of *D. simulans* is thought to have been in East Africa or  
100 Madagascar, this species now has a cosmopolitan distribution [28]. In Australia, *D. simulans*  
101 has been recorded along both east and west coasts as well as Tasmania, with the earliest  
102 record dating to 1956 [29]. Human mobility and human-mediated activities have been  
103 associated with the introduction and spread of both *D. simulans* and *Wolbachia* into  
104 Australia, where wild fly populations occur near human settlements, feeding and breeding on  
105 a variety horticultural crops [30,31]. Several *Wolbachia* strains from supergroups A and B  
106 can naturally occur in populations of *D. simulans* (e.g. wAu, wRi, wHa, wMa and wNo)  
107 [32,33]. From these, wAu is associated with strong antiviral protection against Flock House  
108 virus (*Nodaviridae*) and *Drosophila C virus* (*Dicistroviridae*) under experimental conditions  
109 [32]. The wAu infection in Australia was one of the first *Wolbachia* infections identified as

110 showing no cytoplasmic incompatibility despite being widespread at a low to intermediate  
111 frequency [34]. *wAu* was subsequently demonstrated to be increasing in frequency along the  
112 east coast of Australia, until it was replaced by *wRi* that shows cytoplasmic incompatibility  
113 but which has not yet reached the west coast [30]. In this study, we used a meta-  
114 transcriptomic (i.e. RNA shotgun sequencing) approach to determine the virome diversity of  
115 individual field-collected *D. simulans* flies from Western Australia, and investigated how this  
116 virome diversity might be impacted by the presence of the *wAu* strain of *Wolbachia*.

117

## 118 **Methods**

### 119 *D. simulans* collection and taxonomic identification

120 Flies used for the virus work were collected at Raeburn Orchards in the Perth Hills in  
121 Western Australia (Long. 116.0695, Lat. -32.1036) in July 2018 using banana bait. The  
122 *Wolbachia* frequency at two other locations in the area (Roleystone, Long. 116.0701, Lat. -  
123 32.1396; Cannington, Long. 115.9363, Lat. -32.0243) was also established with additional  
124 samples. Taxonomic identification to the species level was conducted based on the  
125 morphology of reproductive traits of males and via DNA barcoding. Field-collected flies  
126 were maintained at 19°C under standard laboratory conditions until F1 offspring were raised.  
127 Parental and F1 generations were then stored at -80°C until molecular processing.

### 128 *Wolbachia* detection

129 *Wolbachia* infection of field females was determined using F1 offspring from each field  
130 female. Note that *wAu* is transmitted at 100% from field females to the F1 laboratory  
131 generation [34]. DNA extraction from heads was performed using the Chelex 100 Resin (Bio-  
132 Rad Laboratories, Hercules, CA, USA) [35] as adapted in Shi *et al.* [27]. Screening of natural  
133 *Wolbachia* infection was conducted using a real-time PCR/ high-resolution melt assay  
134 (RT/HRM) and strain-specific primers targeting a 340-bp region of the surface protein of  
135 *Wolbachia* (*wsp*) gene for *wRi* and *wAu* strains. The assay was run following the protocol of  
136 Kriesner *et al.* [30]. In addition, reads were mapped to reference *Wolbachia wsp* gene  
137 sequences for *wRi* (CP001391.1) and *wAu* (LK055284.1) with BMAP v.37.98 (minid=0.95)  
138 (available at <https://sourceforge.net/projects/bbmap/>).

139

### 140 *RNA extraction and meta-transcriptome sequencing*

141 We screened a total of 16 individual flies to assess the effect of *Wolbachia* infection on  
142 virome composition in *D. simulans*. Specimens were rinsed three times in RNA and DNA-  
143 free PBS solution (GIBCO). Total RNA from individual flies was extracted using the RNeasy  
144 Plus Mini Kit (Qiagen) following the manufacturer's instructions. RNA-seq libraries were  
145 constructed using a TruSeq total RNA Library Preparation Kit (Illumina). Host ribosomal  
146 depletion was performed using a Ribo-Zero Gold rRNA Removal Kit (Human/Mouse/Rat)  
147 (Illumina). Paired-end transcriptome sequencing was generated on the HiSeq2500 platform  
148 (Illumina).

149

#### 150 *De novo meta-transcriptome assembly and viral genome annotation*

151 The overall quality assessment of reads was conducted in FastQC and Trimmomatic [36]. A  
152 *de novo* assembly of RNA-Seq data was performed using MEGAHIT v.1.1.3, with default  
153 parameters [37]. Assembled contigs were then annotated through comparisons against the  
154 NCBI nonredundant (NCBI-nr) database using DIAMOND v2.0.4 [38], with a cut-off e-value  
155  $<1e-05$ . To identify protein-encoding sequences, open reading frames (ORFs) were predicted  
156 in positive and reverse-complement strands, with a minimum length of 600 nt between two  
157 stop codons using the GetOrf program (EMBOSS) [39]. Functional annotation was carried  
158 out using InterProScan v5.39-77.0 [40], and the HMMer software (<http://hmmer.org/>) was  
159 used to perform sequence-profile searches against the Pfam HMM database. To expand the  
160 *de novo* assembled contigs of known viruses, the reads were mapped against reference  
161 genomic sequences. Provisional virus names were derived from geographic locations in the  
162 Perth Hills.

163

#### 164 *Estimates of viral abundance*

165 Viral abundance was assessed using the number of reads per million (RPM). This metric  
166 quantifies the number of reads per million mapped to a given contig assembly over the total  
167 number of reads. RPM values lower than 0.1% of the highest count for each virus across  
168 samples were presumed to be index-hopping artifacts and excluded from the remaining  
169 analyses [41]. To compare abundance levels, reads were mapped to reference ribosomal and  
170 mitochondrial genes from *Wolbachia* (*16S* and *cox1*), *D. simulans* (*rpl32* and *cox1*), as well  
171 as against all the RNA viruses identified upon the annotation analyses. Mapping was  
172 performed using BMap v.37.98 (available at <https://sourceforge.net/projects/bbmap/>).

173

174 *Sequence alignment and phylogenetic analysis*

175 RNA viral sequences identified in *D. simulans* were compared with homologous reference  
176 sequences retrieved from the NCBI GenBank database and aligned with MAFF v7.450 (E-  
177 INS-I algorithm) [42]. Phylogenetic trees on these data were then inferred using sequences of  
178 the conserved RNA-dependent RNA polymerase (RdRp) gene. To this end, both the best-fit  
179 model of amino acid substitution and phylogenetic relationships were estimated using the  
180 Maximum Likelihood (ML) [43] approach implemented in IQ-TREE v1.6.12 [44]. Nodal  
181 support was estimated combining the SH-like approximate likelihood ratio test (SH-aLRT)  
182 and the Ultrafast Bootstrap Approximation (UFboot) [45]. Redundant contigs with over 99%  
183 amino acid similarity were excluded from the phylogenetic analysis.

184  
185 *Statistical analysis*

186 The assumption of data normality was assessed by visual inspection and using Kolmogorov-  
187 Smirnov (K-S) and Shapiro-Wilk's tests. As the data was not normally distributed, a Mann-  
188 Whitney-Wilcoxon test was used to compare the RNA virome composition with respect to  
189 the presence/absence of *Wolbachia*. Comparisons were made using raw and transformed data  
190 corresponding to RPM values (i.e. viral abundance) for each library. All the analyses were  
191 performed using R software package rstatix.

192

193 **Results**

194 A total of 272 female flies were wild-caught in the Perth Hills in Western Australia and tested  
195 for *Wolbachia* infection through their F1s. The overall prevalence of *Wolbachia* was 63.6%  
196 (173/272), with frequencies at the three sampled locations varying from 54.8% (Raeburn  
197 Orchard, N = 73) to 63.8% (Roleystone, N = 130) and 72.5% (Cannington, N = 69). From the  
198 Raeburn Orchard field females, we randomly selected a subset of 16 flies representing eight  
199 *Wolbachia*-positive and eight *Wolbachia*-negative specimens for individual sequencing and  
200 RNA virus screening.

201 We identified the *Wolbachia* strain in *D. simulans* using sequence-specific primers  
202 targeting the *wsp* gene. We further confirmed the occurrence of *Wolbachia* by mapping the  
203 reads back to the *wRi* and *wAu* *wsp* gene. Most of the *Wolbachia*-infected flies showed a  
204 median coverage >100 reads, number of mapping reads >40, and coverage percentage  
205 >90% to the reference *wAu* strain, confirming that infected flies harbor *wAu* rather than the



206 wRi strain of *Wolbachia*. No reads mapped to the *wsp* gene for library RAPP88 (**Table S1**)  
207 despite the positive infection status determined using a *Wolbachia* specific qPCR assay.

208 For the sake of comparison of virus diversity among libraries, we mapped the reads of  
209 each library to stably expressed genes - *16S* and *cox1* in *Wolbachia* and *rpl32* and *cox1* in *D.*  
210 *simulans*. This provided an internal control to identify any effect on viral abundance due to  
211 potential biases introduced during RNA extraction or library preparation. Although, as  
212 expected, there was moderate variation in the abundance values, expression levels of  
213 reference maker genes were relatively stable across libraries in both *Wolbachia* and *D.*  
214 *simulans* (**Figure 1**).

215 Overall, we detected ten viruses in the 16 *D. simulans* studied here, five of which  
216 were novel (**Figure 2**). Specifically, five viruses shared high sequence identity at the amino  
217 acid level ( $> 96\%$ , e-value =  $0.00E+00 - 4.2E-41$ ) to the RdRp of known RNA viruses,  
218 whereas the newly discovered viruses shared only between 32.6% to 62.6% amino acid  
219 identity to the best viral hit (e-value =  $0.00E+00 - 1.4E-06$ ) (**Table 1, Table S4**). Similarly, in  
220 five cases phylogenetic analysis of the virus sequences identified revealed close relationships  
221 with known *Drosophila*-associated viruses: Galbut virus (*Partitiviridae*), La Jolla virus  
222 (*Iflaviridae*), Thika virus (*Picornaviridae*), Nora virus (*Picornaviridae*) and Chaq virus  
223 (unclassified) (**Figure 3**). The novel viruses identified, that did not share close phylogenetic  
224 relationships to known viruses, were: Raeburn bunya-like virus (*Bunyaviridae*), Araluen  
225 mito-like virus (*Mitoviridae*), Carmel mito-like virus (*Mitoviridae*), Lesley reo-like virus  
226 (*Reoviridae*), and Cannin tombus-like virus (*Tombusviridae*) (**Figure 3**). Similarity searches  
227 against the NCBI/nr database showed that individual flies carried multiple invertebrate-  
228 associated viruses from different virus families. For example, up to six viruses were observed  
229 in a single wAu-negative library (RAPN56) (**Figure 4, Table S2**).

230 Some of the newly discovered RNA viruses identified here were likely infecting hosts  
231 other than *D. simulans*, and hence might be associated with the fly diet or microbiome.  
232 Specifically, these viruses were closely related to *Phytomonas* sp. TCC231 leishbunyavirus 1  
233 (in the case of Raeburn bunya-like virus), *Leptomonas pyrrocoris* RNA virus (Cannin  
234 tombus-like virus) and two mito-like viruses (Araluen mito-like virus and Carmel mito-like  
235 virus) (**Figure 3, Table S3**), that are associated with trypanosomatid protozoans and fungal  
236 hosts, respectively. In contrast, Lesley reo-like virus is likely a *bona fide* arthropod virus. The  
237 five newly identified viruses in this study corresponded to full or nearly complete genomes  
238 (see below). However, for the majority of the known *Drosophila* viruses we only were able to



239 identify ORFs encoding the RdRp: the exceptions were La Jolla virus and Thika virus for  
240 which we also predicted structural components corresponding to coat and capsid proteins.

241 We next characterized the virome profile present in *D. simulans* in relation to the *wAu*  
242 infection status (**Figure 2, Table 1, Table S4**). Accordingly, we identified a slightly higher  
243 number (n=10) of viruses in *Wolbachia*-negative flies compared to *Wolbachia*-positive flies  
244 (n=7). Among these, Galbut virus, Chaq virus, Nora virus, Thika virus, as well as three novel  
245 viruses identified in this study - Raeburn bunya-like virus, Araluen mito-like virus and  
246 Cannin tombus-like virus - were present in *D. simulans* regardless of *Wolbachia* infection. In  
247 contrast, La Jolla virus, as well as the novel Carmel mito-like virus and Lesley reo-like virus,  
248 were only found in *wAu*-negative flies. Overall, assembled viral contigs displayed high  
249 sequence similarity at nucleotide and amino acid level within and between libraries and  
250 regardless of the presence/absence of *Wolbachia* (**Table S3**).

251 We also assessed the potential effect of *Wolbachia* infection on the abundance of  
252 RNA viruses present in *wAu*-infected and *wAu*-uninfected flies. Overall, the number of non-  
253 rRNA reads represented ~50% of the total of reads (n= 743,389,696 pair-end reads) (**Figure**  
254 **S1**). Furthermore, the RPM values among viruses infecting *Wolbachia* negative and positive  
255 infected flies was highly heterogeneous, ranging from 47 to 232,346 and 7 to 37,688 virus  
256 RPM, respectively. With the exception of Thika virus, viruses present in both *wAu*-positive  
257 and *wAu*-negative flies were 1.87 – 40.17-fold more abundant in the *wAu*-negative  
258 individuals than *wAu*-positive *D. simulans*. In contrast, the abundance of Thika virus was  
259 0.39-fold higher in the *Wolbachia*-positive flies (**Figure 3, Table S2**). However, despite this  
260 variation in virus abundance levels between groups, there was a non-significant difference  
261 between *wAu*-negative and *wAu*-positive *D. simulans* (Mann-Whitney-Wilcoxon test; **Figure**  
262 **5**). In the case of the viruses only detected in the *wAu*-negative flies, La Jolla virus was  
263 present in a single library in moderate abundance (RPM = 378), whilst the newly discovered  
264 Lesley reo-like virus was detected in 4/8 libraries (RPM = 3360 - 8749) (**Table S2**).

265

## 266 Discussion

267 The occurrence and spread of *Wolbachia* infection has been widely documented in natural  
268 populations of *Drosophila* [10,30,46]. Indeed, *D. simulans* is commonly used as an  
269 experimental model to investigate the interactions within the tripartite *Drosophila*-  
270 *Wolbachia*-virus system. In Australia, *D. simulans* can be naturally infected with two  
271 *Wolbachia* strains from supergroup A - *wAu* and *wRi*. While *wRi* has been gradually

272 displacing *wAu* in eastern Australia, reflected in the changing infection frequencies in  
273 surveyed populations since 2004, *D. simulans* from the west coast of Australia only harbor  
274 the *wAu* strain [30]. A simple and plausible explanation for this difference is the geographic  
275 separation of *D. simulans* populations inhabiting the east and west coasts of Australia and the  
276 challenging environmental conditions posed by the intervening desert [30].

277 We corroborated the presence of *Wolbachia* infection across samples by identifying  
278 the *wsp*, *16S* and *cox1* marker genes. The lack of reads mapping to the library RAPP88 might  
279 reflect either low levels of *wsp* RNA molecules present in the input for library preparation or  
280 high variability compared to the reference sequence. Although *Wolbachia* density was not  
281 experimentally assessed, the similar levels of *16S* and *cox-1* abundance across libraries  
282 suggest no appreciable biases in the library preparation and RNA sequencing steps.

283 Estimates from previous surveys showed that the frequency of the *wAu* strain in  
284 Western Australia exceeded 50% in *D. simulans* [30]. This is consistent with the data  
285 provided here and suggests that *Wolbachia* might be present in a significant proportion of the  
286 natural fly population, at least around Perth. Although *wAu* does not cause cytoplasmic  
287 incompatibility, its spread is hypothesized to confer fitness advantages (increased survival  
288 and/or reproduction) to the host, including antiviral protection [47,48], that might favour its  
289 spread and prevent the bacteria from being eliminated from *D. simulans* populations [30,49].  
290 However, our comparison of *Wolbachia*-infected and uninfected *D. simulans* in western  
291 Australia revealed no clear effect of *Wolbachia* infection on virome composition and viral  
292 abundance between *Wolbachia* infected/uninfected animals. Although our analysis is based  
293 on a small sample of individual flies, the apparent absence of a *Wolbachia*-mediated virus  
294 protection effect in natural *D. simulans* is compatible with previous findings on *D.*  
295 *melanogaster* naturally infected with *wMel* in eastern Australia [27], in which virus  
296 protection was not observed regardless of the *Wolbachia* infection status and *Wolbachia*  
297 density. Even so, the absence of significant association between *wAu* infection and virus  
298 diversity does not necessarily translate into a homogeneous effect of *wAu* on the different  
299 viruses identified here. For example, it is plausible that the restricted presence of La Jolla  
300 virus and the newly identified Lesley reo-like virus in *Wolbachia*-free flies could reflect some  
301 impact of antiviral protection in *D. simulans* [27,50]. Indeed, contrasting results were  
302 observed in *D. melanogaster*, where La Jolla virus was widely distributed across different  
303 libraries [27].

304 It has previously been shown that the *wAu* strain of *Wolbachia* has a protective role  
305 against virus infection in *D. simulans* when flies are challenged with Flock House virus  
306 (FHV) and Drosophila C virus (DCV) in a laboratory setting [24,32]. Moreover, the *wAu*  
307 strain is protective against the Dengue and Zika viruses in *Aedes aegypti* mosquitoes [51].  
308 Although our observation of an apparent lack of *Wolbachia*-mediated antiviral protection  
309 contrasts with those obtained previously, it is likely that differences may depend on  
310 *Wolbachia*-host species combinations and natural/artificial viral infections, which may also  
311 explain the contrasting results for La Jolla virus. Indeed, most of the available studies have  
312 documented the antiviral effect in transinfected insect hosts with non-natural *Wolbachia*  
313 strains/viruses under laboratory conditions, as opposed to the study of the natural virome  
314 undertaken here. This highlights the importance of careful studies of the interactions within  
315 the host-virus-*Wolbachia* system along with environmental factors in natural populations  
316 [52–54].

317 As well as the small sample size, an important caveat of our work is that we explored  
318 the *Wolbachia*-mediated virus protection in terms of virus abundance levels reflected in RPM  
319 values. This provides insights into virus resistance, but not on tolerance or host survival.  
320 Thus, it is still possible that *Wolbachia* is increasing tolerance to virus infection as have been  
321 documented for DCV [32]. In addition, although we were not able to assess *Wolbachia*  
322 density, previous studies have shown that *wAu* is maintained at high-density in *D. simulans*  
323 and has a role on virus blocking [55]. Further research is clearly needed to assess these  
324 features in natural populations in order to determine any link with antiviral protection.

325 Collectively, comparisons of the virome composition in *wAu* infected/uninfected *D.*  
326 *simulans* showed the presence of natural and relatively highly abundant *Drosophila*  
327 associated viruses in both groups [25,27,56]. In addition to insect-associated viruses, we  
328 identified viruses that are likely to infect other hosts and hence were likely associated with  
329 components of *D. simulans* diet or microbiome [57]. For instance, novel viruses from the  
330 families *Tombusviridae* and *Bunyaviridae* were related to virus in trypanosomatid protozoa  
331 (*Leptomonas* and *Leishmania*). Similarly, given their normal host range distribution, the  
332 novel viruses from the family *Narnaviridae* might be associated with fungal hosts. Evidence  
333 of trypanosomatids and fungi have been reported in the gut of several species of *Drosophila*,  
334 with effects on larvae eclosion and pupation times [57,58]. This, in turn, highlights the extent  
335 to which Australian *D. simulans* can be parasitized in nature [58–62].

336

337 **Authors and contributors**

338  
339 Conceptualization, M.S., A.A.H. and E.C.H.; methodology, A.S.O.-B., M.S., A.A.H. and  
340 E.C.H., formal analysis, A.S.O.-B.; investigation, A.S.O.-B. and M.S.; resources, A.A.H.  
341 and E.C.H.; writing—original draft preparation A.S.O.-B.; writing—review and editing  
342 A.A.H., M.S and E.C.H.; visualization, A.S.O.-B.; supervision, E.C.H.; All authors have read  
343 and agreed to the published version of the manuscript.

344

345 **Conflicts of interest**

346 The authors declare that there are no conflicts of interest.

347

348

349 **Funding information**

350 This research was funded by an Australian Research Council Australian Laureate Fellowship  
351 to E.C.H (grant FL170100022), a National Health and Medical Research Council (NHMRC)  
352 Research Fellowship to A.A.H. (grant 1118640), and an NHMRC Project grant (grant  
353 GNT1103804).

354

355 **Data summary**

356 The viral genome sequence data generated in this study has been deposited in the  
357 NCBI/GenBank database under the accession numbers MW976812-MW976882. Sequence  
358 reads are available at the public Sequence Read Archive (SRA) database under the BioProject  
359 accession PRJNA706433 (BioSample accessions: SAMN18132282- SAMN18132297).

360

361 **Acknowledgements**

362 We thank Vanessa White for research assistance support to conduct this study.

## 363 References

364

365 1. **Zug R, Hammerstein P.** Bad guys turned nice? A critical assessment of *Wolbachia*  
366 mutualisms in arthropod hosts. *Biol Rev Camb Philos Soc.* 2015;90:89–111.

367 2. **Ross PA, Turelli M, Hoffmann AA.** Evolutionary ecology of *Wolbachia* releases for  
368 disease control. *Annu Rev Genet.* 2019;53:93–116.

369 3. **Ros VID, Fleming VM, Feil EJ, Breeuwer JAJ.** How diverse is the genus  
370 *Wolbachia*? Multiple-gene sequencing reveals a putatively new *Wolbachia*  
371 supergroup recovered from spider mites (Acari: Tetranychidae). *Appl Environ*  
372 *Microbiol.* 2009;75:1036–43.

373 4. **Scholz M, Albanese D, Tuohy K, Donati C, Segata N, Rota-Stabelli O.** Large scale  
374 genome reconstructions illuminate *Wolbachia* evolution. *Nat Commun.* 2020;11:1–11.

375 5. **Zouache K, Voronin D, Tran-Van V, Mousson L, Failloux A-B, Mavingui P.**  
376 Persistent *Wolbachia* and cultivable bacteria infection in the reproductive and somatic  
377 tissues of the mosquito vector *Aedes albopictus*. *PLoS One.* 2009;4:e6388.

378 6. **Dobson SL, Bourtzis K, Braig HR, Jones BF, Zhou W, Rousset F, et al.** *Wolbachia*  
379 infections are distributed throughout insect somatic and germ line tissues. *Insect*  
380 *Biochem Mol Biol.* 1999;29:153–60.

381 7. **Frydman HM, Li JM, Robson DN, Wieschaus E.** Somatic stem cell niche tropism in  
382 *Wolbachia*. *Nature.* 2006;441:509–12.

383 8. **Tsai K-H, Lien J-C, Huang C-G, Wu W-J, Chen W-J.** Molecular (sub)grouping of  
384 endosymbiont *Wolbachia* infection among mosquitoes of Taiwan. *J Med Entomol.*  
385 2004;41:677–83.

386 9. **Strunov A, Kiseleva E.** *Drosophila melanogaster* brain invasion: Pathogenic  
387 *Wolbachia* in central nervous system of the fly. *Insect Sci.* 2016;23:253–64.

388 10. **Turelli M, Cooper BS, Richardson KM, Ginsberg PS, Peckenpaugh B, Antelope**  
389 **CX, et al.** Rapid global spread of wRi-like *Wolbachia* across multiple *Drosophila*.  
390 *Curr Biol.* 2018;28:963-971.e8.

391 11. **O’Neill SL, Hoffmann A, Werren J.** Influential Passengers: Inherited  
392 Microorganisms and Arthropod Reproduction. 1 ed. Oxford University Press; 1997.

393 12. **Iturbe-Ormaetxe I, O’Neill SL.** *Wolbachia*-host interactions: connecting phenotype  
394 to genotype. Vol. 10, Current Opinion in Microbiology. 2007. 221–4.

395 13. **Dedine F, Vavre F, Fleury F, Loppin B, Hochberg ME, Boulétreau M.** Removing  
396 symbiotic *Wolbachia* bacteria specifically inhibits oogenesis in a parasitic wasp. *Proc*  
397 *Natl Acad Sci U S A.* 2001;98:6247–52.

398 14. **Hoerauf A, Nissen-Pähle K, Schmetz C, Henkle-Dührsen K, Blaxter ML, Büttner**  
399 **DW, et al.** Tetracycline therapy targets intracellular bacteria in the filarial nematode  
400 *Litomosoides sigmodontis* and results in filarial infertility. *J Clin Invest.* 1999;103:11–  
401 8.

402 15. **Nikoh N, Hosokawa T, Moriyama M, Oshima K, Hattori M, Fukatsu T.**  
403 Evolutionary origin of insect-*Wolbachia* nutritional mutualism. *Proc Natl Acad Sci U*  
404 *S A.* 2014;111:10257–62.

405 16. **Ju JF, Bing XL, Zhao DS, Guo Y, Xi Z, Hoffmann AA, et al.** *Wolbachia*  
406 supplement biotin and riboflavin to enhance reproduction in planthoppers. *ISME J.*  
407 2020;14:676–87.

408 17. **Hosokawa T, Koga R, Kikuchi Y, Meng XY, Fukatsu T.** *Wolbachia* as a  
409 bacteriocyte-associated nutritional mutualist. *Proc Natl Acad Sci U S A.*  
410 2010;107:769–74.

411 18. **Tantowijoyo W, Andari B, Arguni E, Budiwati N, Nurhayati I, Fitriana I, et al.**



- 412 Stable establishment of wMel *Wolbachia* in *Aedes aegypti* populations in Yogyakarta,  
413 Indonesia. Barker CM, editor. *PLoS Negl Trop Dis*. 2020;14:e0008157.
- 414 19. **Moreira LA, Iturbe-Ormaetxe I, Jeffery JA, Lu G, Pyke AT, Hedges LM, et al.** A  
415 *Wolbachia* symbiont in *Aedes aegypti* limits infection with Dengue, Chikungunya, and  
416 Plasmodium. *Cell*. 2009;139:1268–78.
- 417 20. **Rancès E, Ye YH, Woolfit M, McGraw EA, O’Neill SL.** The Relative Importance of  
418 Innate Immune Priming in *Wolbachia*-Mediated Dengue Interference. Schneider DS,  
419 editor. *PLoS Pathog*. 2012;8:e1002548.
- 420 21. **Zug R, Hammerstein P.** *Wolbachia* and the insect immune system: what reactive  
421 oxygen species can tell us about the mechanisms of *Wolbachia*-host interactions. *Front*  
422 *Microbiol*. 2015;6:1201.
- 423 22. **Terradas G, Joubert DA, McGraw EA.** The RNAi pathway plays a small part in  
424 *Wolbachia*-mediated blocking of dengue virus in mosquito cells. *Sci Rep*. 2017;7.
- 425 23. **Teixeira L, Ferreira Á, Ashburner M.** The bacterial symbiont *Wolbachia* induces  
426 resistance to RNA viral infections in *Drosophila melanogaster*. *PLOS Biol*. 2008;6:1–  
427 11.
- 428 24. **Martinez J, Longdon B, Bauer S, Chan Y-S, Miller WJ, Bourtzis K, et al.**  
429 Symbionts commonly provide broad spectrum resistance to viruses in insects: A  
430 comparative analysis of *Wolbachia* strains. Schneider DS, editor. *PLoS Pathog*.  
431 2014;10:e1004369.
- 432 25. **Webster CL, Waldron FM, Robertson S, Crowson D, Ferrari G, Quintana JF, et**  
433 **al.** The discovery, distribution, and evolution of viruses associated with *Drosophila*  
434 *melanogaster*. *PLoS Biol*. 2015;13:e1002210.
- 435 26. **Hedges LM, Brownlie JC, O’Neill SL, Johnson KN.** *Wolbachia* and virus protection  
436 in insects. *Science*. 2008;322:702.
- 437 27. **Shi M, White VL, Schlub T, Eden J-S, Hoffmann AA, Holmes EC.** No detectable  
438 effect of *Wolbachia* wMel on the prevalence and abundance of the RNA virome of  
439 *Drosophila melanogaster*. *Proc R Soc B Biol Sci*. 2018;285:20181165.
- 440 28. **Lachaise D, Cariou M-L, David JR, Lemeunier F, Tsacas L, Ashburner M.**  
441 Historical biogeography of the *Drosophila melanogaster* species subgroup. In:  
442 Evolutionary Biology. Springer US; 1988. p. 159–225.
- 443 29. **Mather W.** Additions to the *Drosophila* fauna of Australia. *Univ Queensl Pap*. 1960;1.
- 444 30. **Kriesner P, Hoffmann AA, Lee SF, Turelli M, Weeks AR.** Rapid sequential spread  
445 of two *Wolbachia* variants in *Drosophila simulans*. *PLoS Pathog*. 2013;9:e1003607.
- 446 31. **Parsons PA, Bock IR.** The population biology of Australian *Drosophila*. *Annu Rev*  
447 *Ecol Syst*. 1979;10:229–45.
- 448 32. **Osborne SE, Leong YS, O’Neill SL, Johnson KN.** Variation in antiviral protection  
449 mediated by different *Wolbachia* strains in *Drosophila simulans*. *PLoS Pathog*.  
450 2009;5:e1000656.
- 451 33. **Casiraghi M, Bordenstein SR, Baldo L, Lo N, Beninati T, Wernegreen JJ, et al.**  
452 Phylogeny of *Wolbachia pipientis* based on *gltA*, *groEL* and *ftsZ* gene sequences:  
453 Clustering of arthropod and nematode symbionts in the F supergroup, and evidence for  
454 further diversity in the *Wolbachia* tree. *Microbiology*. 2005;151:4015–22.
- 455 34. **Hoffmann AA, Clancy D, Duncan J.** Naturally-occurring *Wolbachia* infection in  
456 *Drosophila simulans* that does not cause cytoplasmic incompatibility. *Heredity*  
457 (*Edinb*). 1996;76:1–8.
- 458 35. **Endersby NM, Mckechnie SW, Vogel H, Gahan LJ, Baxter SW, Ridland PM, et**  
459 **al.** Microsatellites isolated from diamondback moth, *Plutella xylostella* (L.), for studies  
460 of dispersal in Australian populations. *Mol Ecol Notes*. 2005;5:51–3.

- 461 36. **Bolger AM, Lohse M, Usadel B.** Trimmomatic: a flexible trimmer for Illumina  
462 sequence data. *Bioinformatics*. 2014;30:2114–20.
- 463 37. **Grabherr MG, Haas BJ, Yassour M, Levin JZ, Thompson DA, Amit I, et al.** Full-  
464 length transcriptome assembly from RNA-Seq data without a reference genome. *Nat*  
465 *Biotechnol*. 2011;29:644–52.
- 466 38. **Buchfink B, Xie C, Huson DH.** Fast and sensitive protein alignment using  
467 DIAMOND. *Nat Methods*. 2015;12:59–60.
- 468 39. **Rice P, Longden L, Bleasby A.** EMBOSS: the European Molecular Biology Open  
469 Software Suite. *Trends Genet*. 2000;16:276–7.
- 470 40. **Zdobnov EM, Apweiler R.** InterProScan - an integration platform for the signature-  
471 recognition methods in InterPro. *Bioinformatics*. 2001;17:847–8.
- 472 41. **Le Lay C, Shi M, Buček A, Bourguignon T, Lo N, Holmes E.** Unmapped RNA  
473 virus diversity in termites and their symbionts. *Viruses*. 2020;12:1145.
- 474 42. **Katoh K, Standley DM.** MAFFT multiple sequence alignment software version 7:  
475 improvements in performance and ssability. *Mol Biol Evol*. 2013;30:772–80.
- 476 43. **Felsenstein J.** Evolutionary trees from DNA sequences: A maximum likelihood  
477 approach. *J Mol Evol*. 1981;17:368–76.
- 478 44. **Nguyen L-T, Schmidt HA, von Haeseler A, Minh BQ.** IQ-TREE: a fast and  
479 effective stochastic algorithm for estimating maximum-likelihood phylogenies. *Mol*  
480 *Biol Evol*. 2015;32:268–74.
- 481 45. **Hoang DT, Chernomor O, Von Haeseler A, Minh BQ, Vinh LS.** UFBoot2:  
482 Improving the ultrafast bootstrap approximation. *Mol Biol Evol*. 2018;35:518–22.
- 483 46. **Turelli M, Hoffmann AA.** Rapid spread of an inherited incompatibility factor in  
484 California *Drosophila*. *Nature*. 1991;353:440–2.
- 485 47. **Ogunlade ST, Adekunle AI, Meehan MT, Rojas DP, McBryde ES.** Modeling the  
486 potential of wAu-*Wolbachia* strain invasion in mosquitoes to control *Aedes*-borne  
487 arboviral infections. *Sci Rep*. 2020;10:16812.
- 488 48. **Mancini MV, Herd CS, Ant TH, Murdochy SM, Sinkins SP.** *Wolbachia* strain wAu  
489 efficiently blocks arbovirus transmission in *Aedes albopictus*. *PLoS Negl Trop Dis*.  
490 2020;14:e0007926.
- 491 49. **Correa CC, Ballard JWO.** *Wolbachia* associations with insects: Winning or losing  
492 against a master manipulator. *Front Ecol Evol*. 2016;3:153.
- 493 50. **Habayeb MS, Cantera R, Casanova G, Ekström J-O, Albright S, Hultmark D.**  
494 The *Drosophila* Nora virus is an enteric virus, transmitted via feces. *J Invertebr*  
495 *Pathol*. 2009;101:29–33.
- 496 51. **Ant TH, Herd CS, Geoghegan V, Hoffmann AA, Sinkins SP.** The *Wolbachia* strain  
497 wAu provides highly efficient virus transmission blocking in *Aedes aegypti*. Schneider  
498 DS, editor. *PLOS Pathog*. 2018;14:e1006815.
- 499 52. **Johnson KN.** The impact of *Wolbachia* on virus infection in mosquitoes. *Viruses*.  
500 2015;7:5705–17.
- 501 53. **Cao L-J, Jiang W, Hoffmann AA.** Life history effects linked to an advantage for  
502 wAu *Wolbachia* in *Drosophila*. *Insects*. 2019;10:126.
- 503 54. **Fenton A, Johnson KN, Brownlie JC, Hurst GDD.** Solving the *Wolbachia* paradox:  
504 Modeling the tripartite interaction between host, *Wolbachia*, and a natural enemy. *Am*  
505 *Nat*. 2011;178:333–42.
- 506 55. **Osborne SE, Iturbe-Ormaetxe I, Brownlie JC, O'Neill SL, Johnson KN.** Antiviral  
507 protection and the mportance of *Wolbachia* density and tissue tropism in *Drosophila*  
508 *simulans*. *Appl Environ Microbiol*. 2012;78:6922–9.
- 509 56. **Palmer WH, Medd NC, Beard PM, Obbard DJ.** Isolation of a natural DNA virus of



- 510 *Drosophila melanogaster*, and characterisation of host resistance and immune  
511 responses. *PLoS Pathog.* 2018;14:e1007050.
- 512 57. **Ebbert MA, Marlowe JL, Burkholder JJ.** Protozoan and intracellular fungal gut  
513 endosymbionts in *Drosophila*: prevalence and fitness effects of single and dual  
514 infections. *J Invertebr Pathol.* 2003;83:37–45.
- 515 58. **Wilfert L, Longdon B, Ferreira AGA, Bayer F, Jiggins FM.** Trypanosomatids are  
516 common and diverse parasites of *Drosophila*. *Parasitology.* 2011;138:858–65.
- 517 59. **Chandler JA, James PM.** Discovery of trypanosomatid parasites in globally  
518 distributed *Drosophila* species. *PLoS One.* 2013;8:e61937.
- 519 60. **Ebbert MA, Burkholder JJ, Marlowe JL.** Trypanosomatid prevalence and host  
520 habitat choice in woodland *Drosophila*. *J Invertebr Pathol.* 2001;77:27–32.
- 521 61. **Lemaitre B, Nicolas E, Michaut L, Reichhart JM, Hoffmann JA.** The dorsoventral  
522 regulatory gene cassette spatzle/Toll/Cactus controls the potent antifungal response in  
523 *Drosophila* adults. *Cell.* 1996;86:973–83.
- 524 62. **Naranjo-Lázaro JM, Mellín-Rosas MA, González-Padilla VD, Sánchez-González**  
525 **JA, Moreno-Carrillo G, Arredondo-Bernal HC.** Susceptibility of *Drosophila*  
526 *suzukii* Matsumura (Diptera: Drosophilidae) to entomopathogenic fungi. *Southwest*  
527 *Entomol.* 2014;39:201–3.
- 528

### *Drosophila simulans*

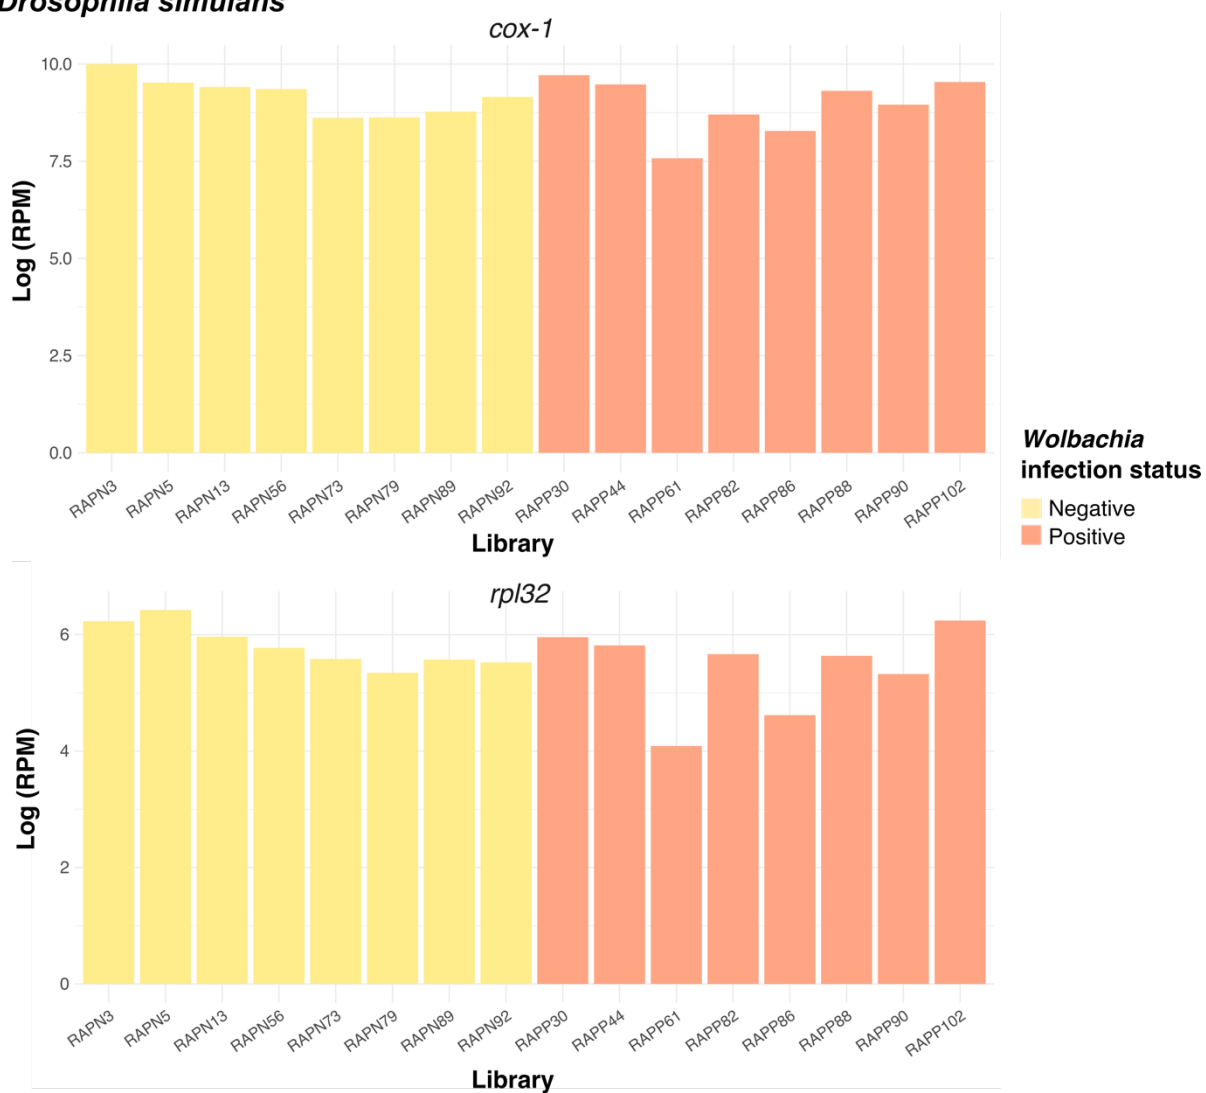

### *Wolbachia* (wAu)

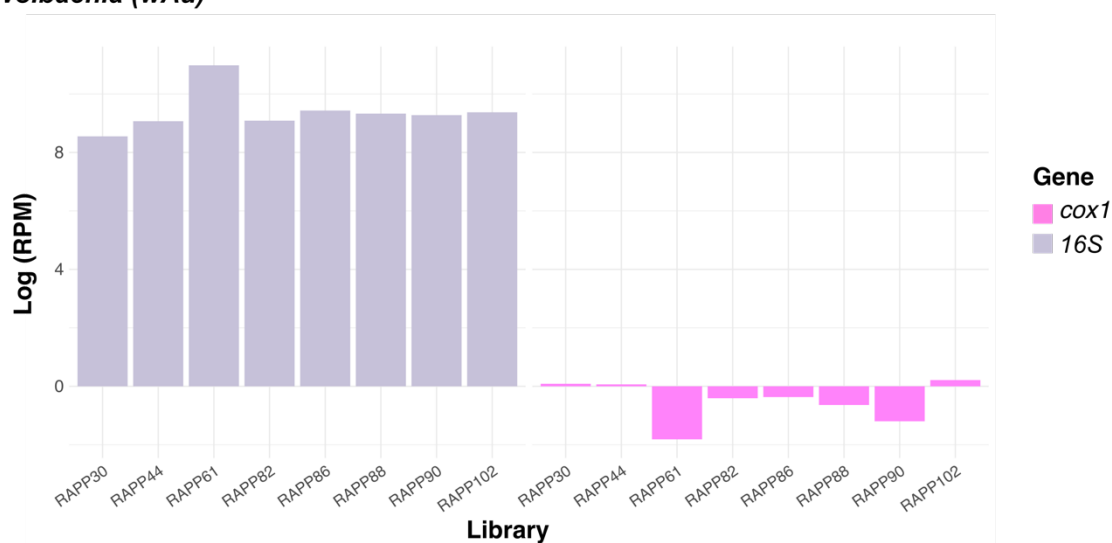

529

530 **Figure 1.** Comparison of the abundance levels of reference genes in *Wolbachia*-positive and  
531 *Wolbachia*-negative individual *D. simulans* (*rpl32* and *cox-1*) and *Wolbachia* sp. (*16S* and  
532 *cox-1*).

533

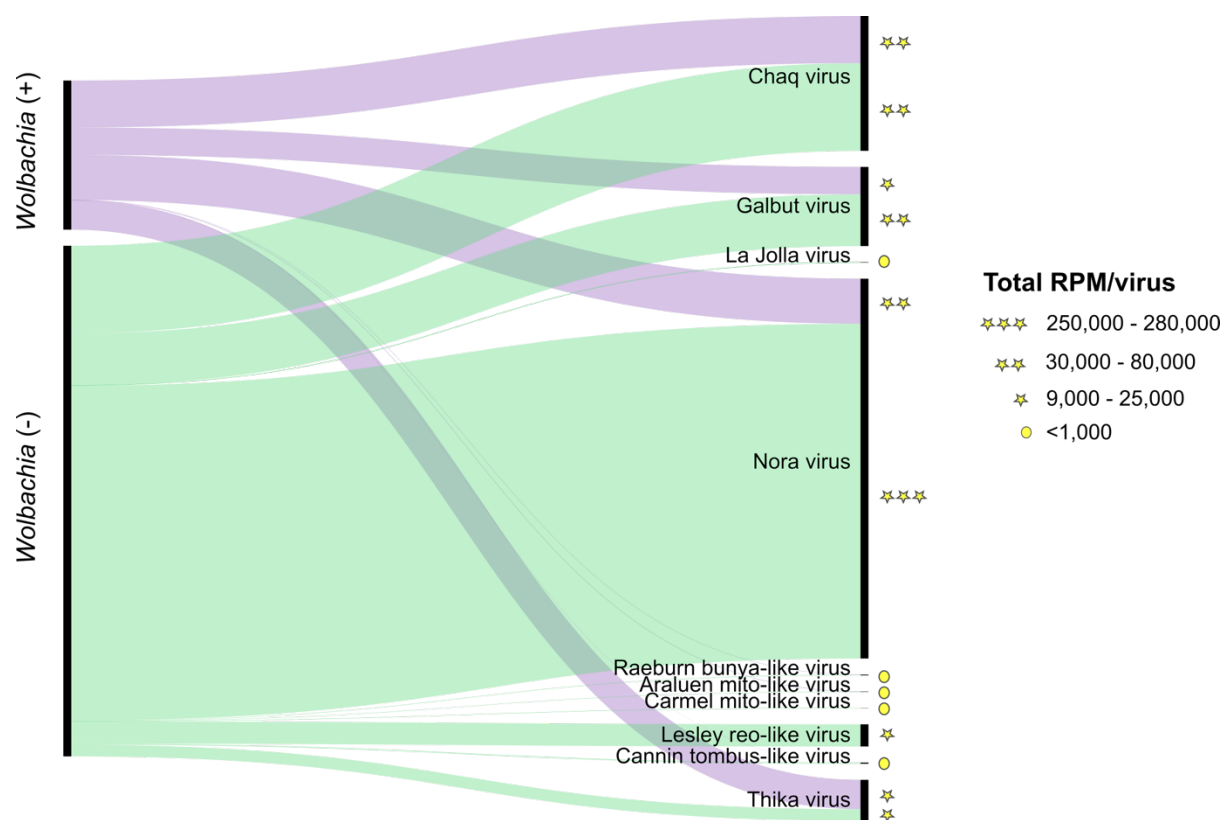

534

535

536 **Figure 2.** Comparison of viruses found in *Wolbachia*-positive and *Wolbachia*-negative *D.*  
537 *simulans*. The thickness of links is proportional to the total abundance (RPM) of each virus  
538 across the samples studied. The range of RPM values are represented with a star and circular  
539 shapes.

A

**Picornavirales**

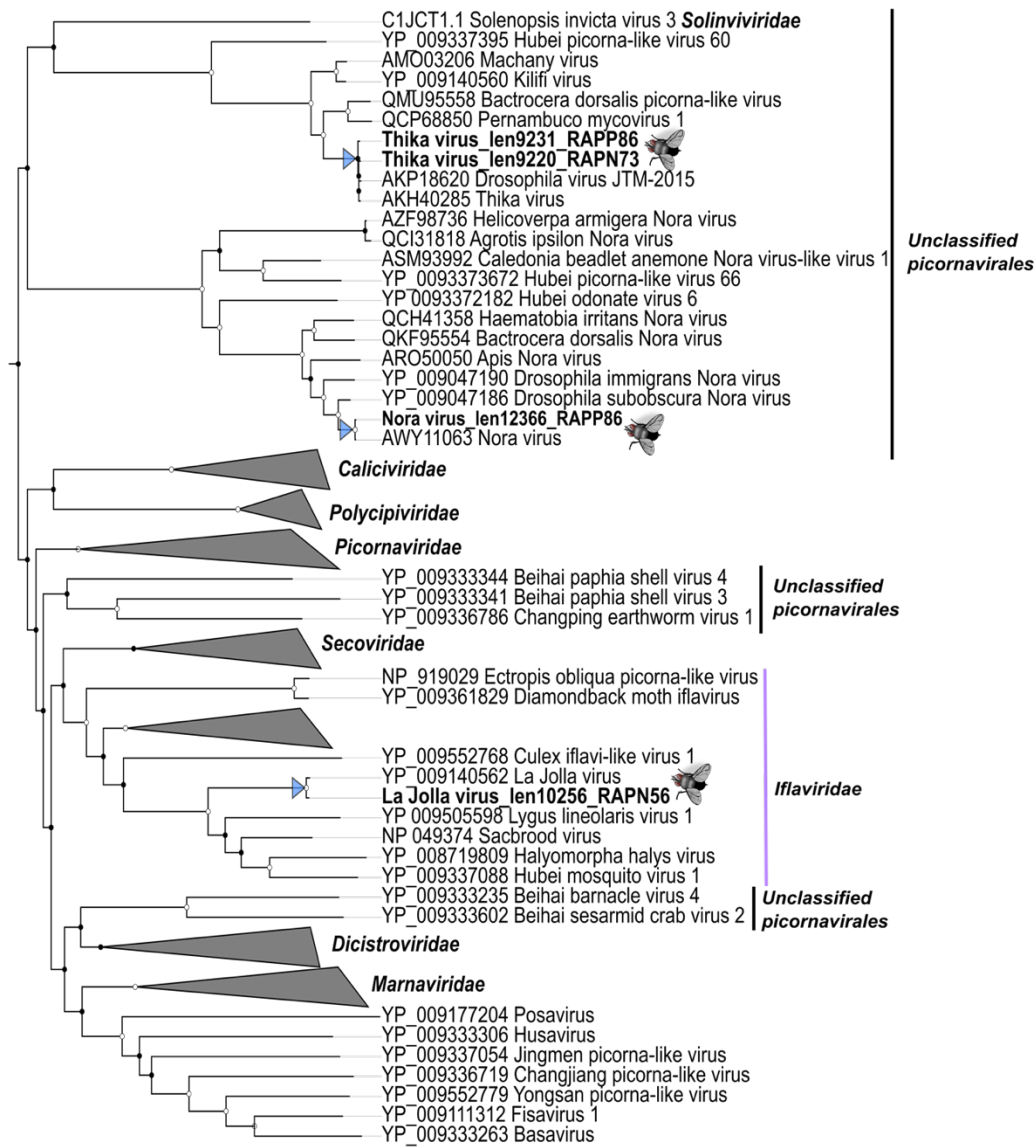

Tree scale: 0.4

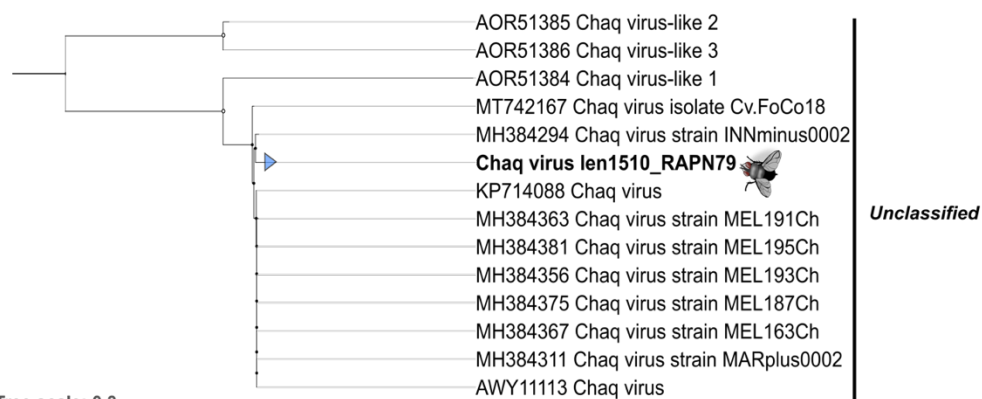

Tree scale: 0.3

B

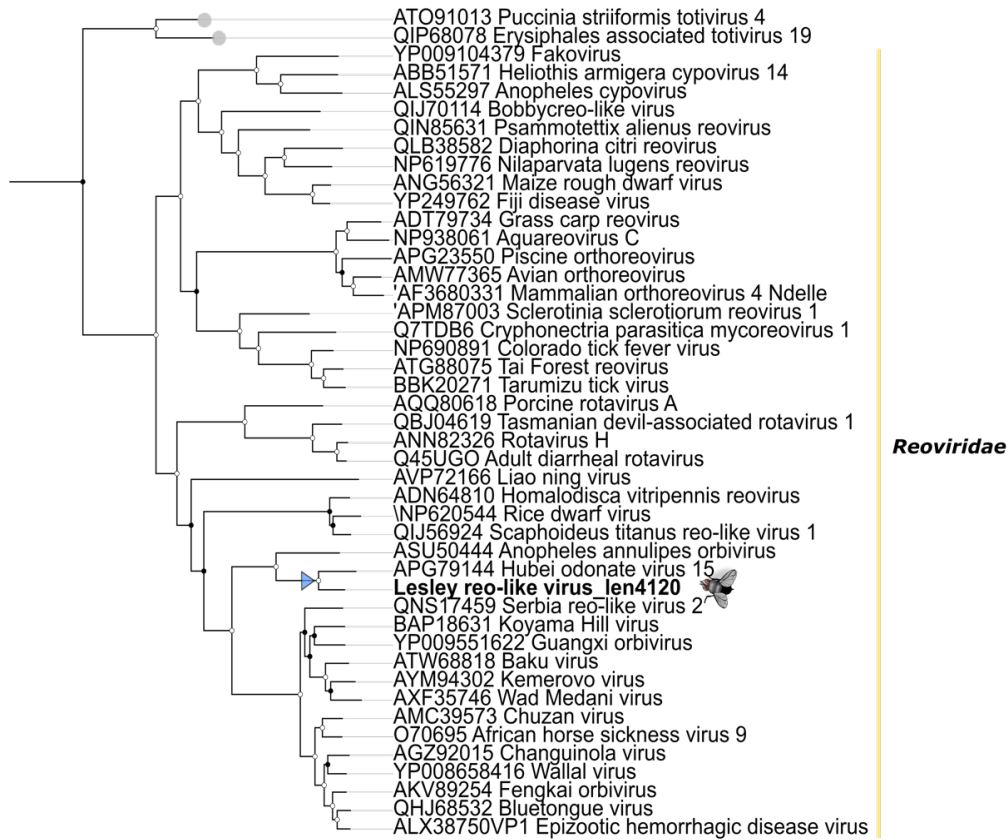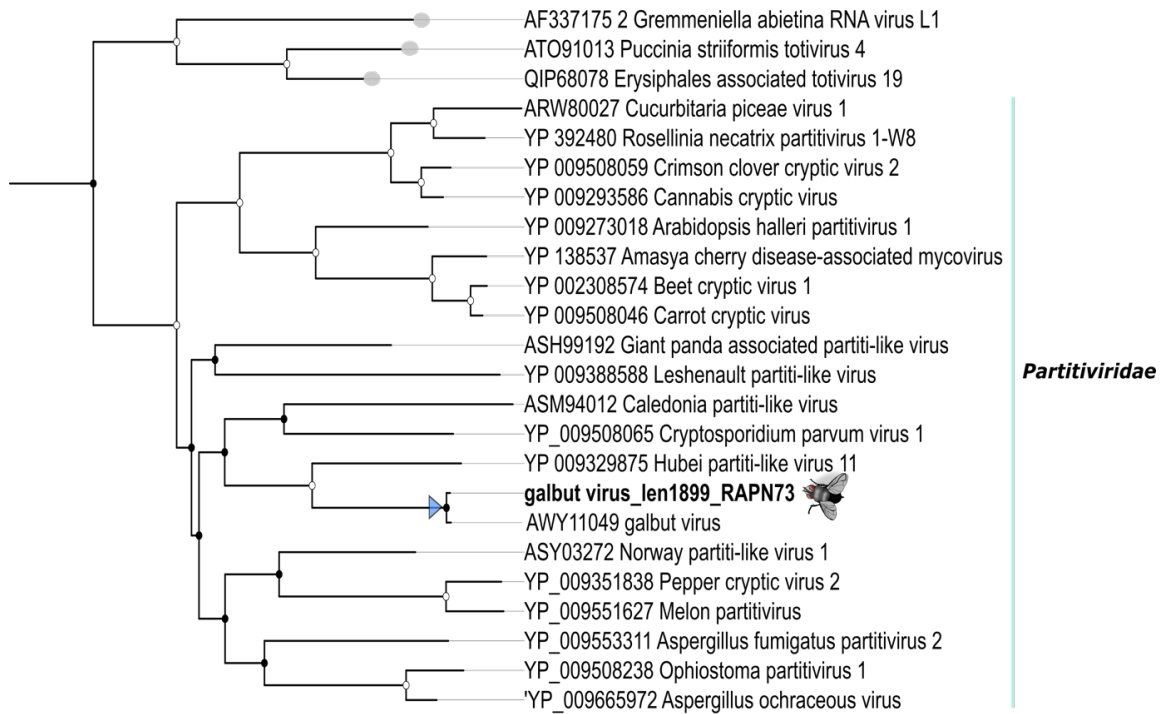

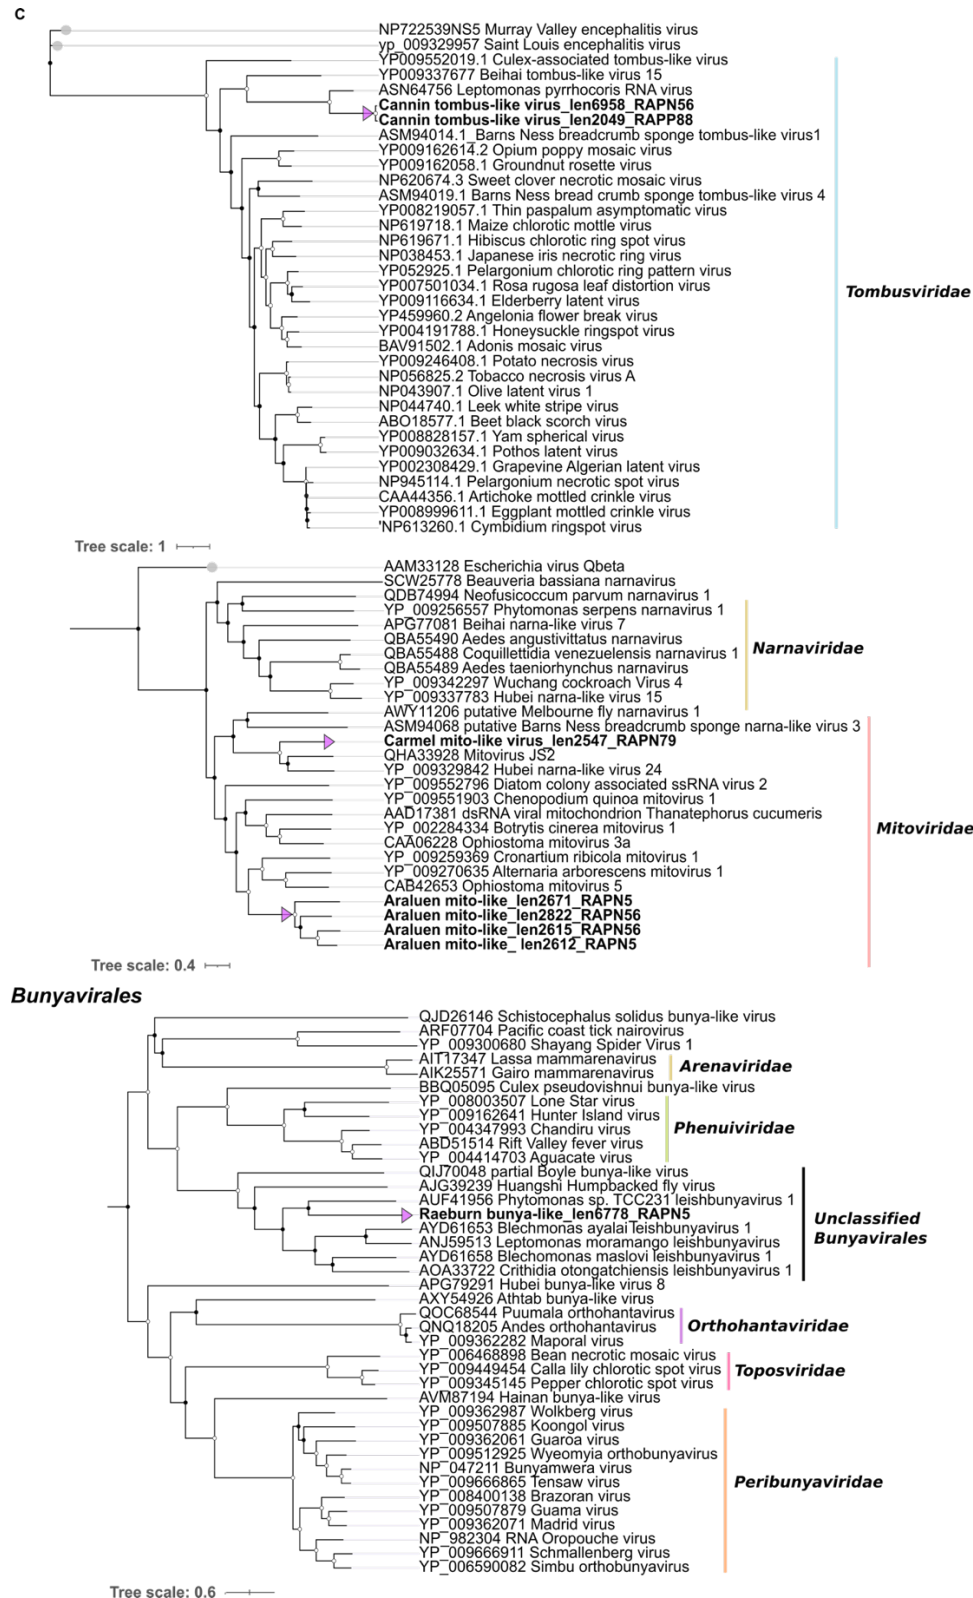

543

544

545 **Figure 3.** Maximum likelihood phylogenetic trees of the viruses identified from *D. simulans*.

546 The phylogenies were inferred based on the amino acid sequences of the RdRp of seven virus

547 taxonomic groups. Virus family trees were rooted with relevant outgroups that are indicated

548 with grey tips. Order-level trees and the Chaq virus phylogeny (for which no suitable  
549 outgroup existed) were midpoint rooted. Coloured arrow tips represent likely (A-B)  
550 *Drosophila*-associated viruses and (C) non-*Drosophila*-associated viruses (i.e. that were more  
551 likely associated with a component of fly diet or microbiome). Nodal support values greater  
552 than 80% (SH-aLRT) and 95% (UFboot) are indicated with white circular shapes at the  
553 nodes. Branch lengths are projected using scale bars below each tree.



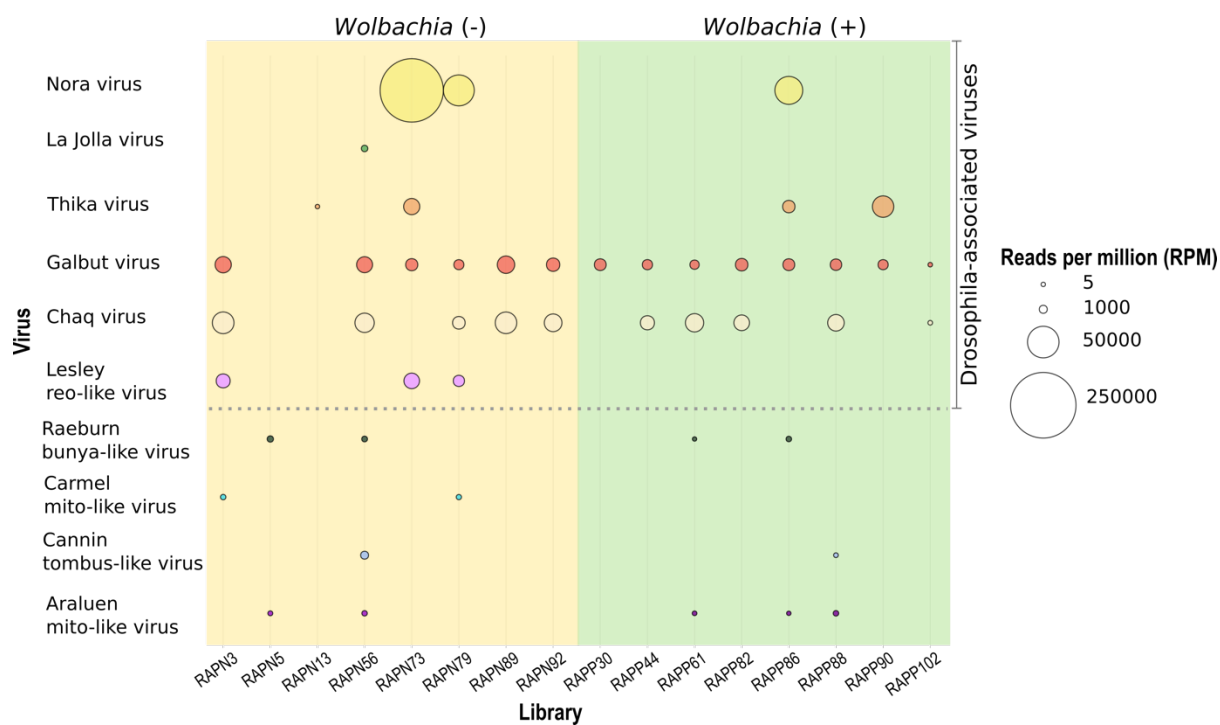

554

555

556 **Figure 4.** Representation of virome composition and abundance (RPM) across *Wolbachia*-  
557 positive and negative libraries. Each library represents an individual *D. simulans* fly. All  
558 reads likely due to index-hopping have been excluded.

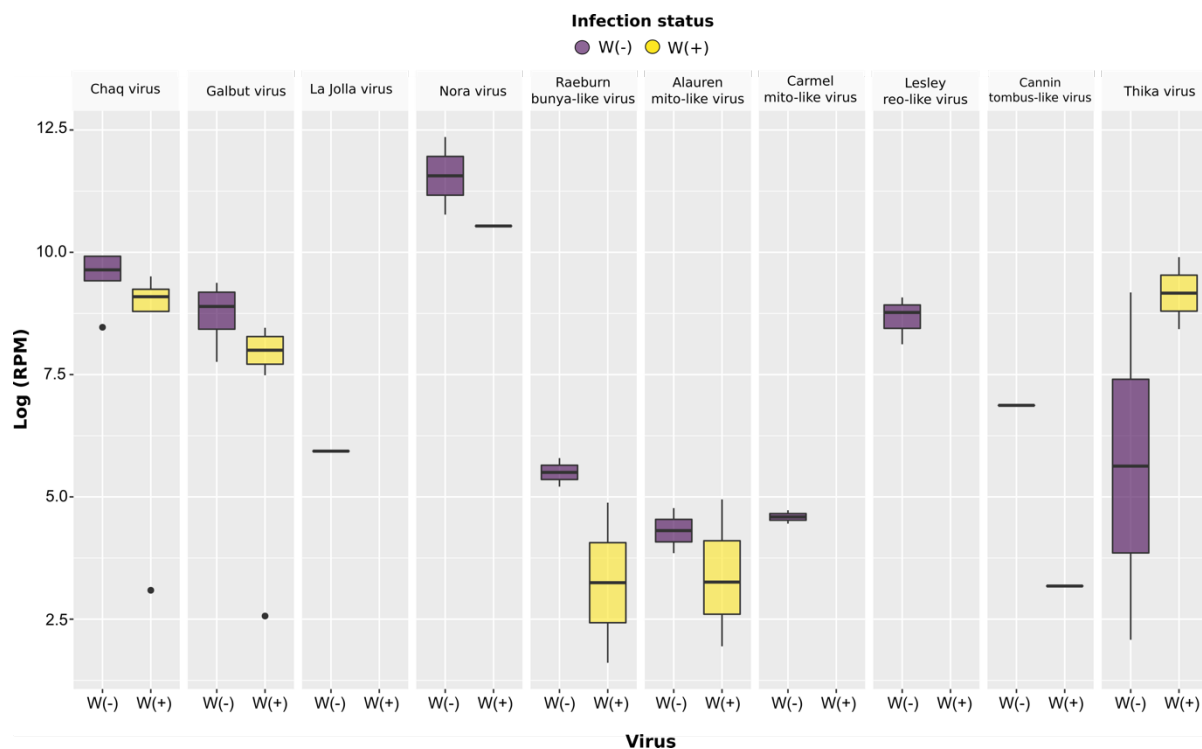

559  
560  
561

562 **Figure 5.** Abundance distribution of seven RNA viruses identified across individual  
563 *Wolbachia*-positive and *Wolbachia*-negative *D. simulans*. A non-significant difference was  
564 observed between *Wolbachia*-infected and uninfected flies using the Mann-Whitney U test.

565 **Table 1.** Summary of sequence similarity searches for viruses against the NCBI non-redundant database. Viral sequences listed below  
 566 correspond to those included in phylogenetic analyses.

567

| Query sequence                             | Library | <i>Wolbachia</i><br>infection | Length<br>(nt) | Best match against the BLAST/nr<br>database                                                  | Similarity | e-value  |
|--------------------------------------------|---------|-------------------------------|----------------|----------------------------------------------------------------------------------------------|------------|----------|
| k119_3301_len12366_nora virus              | RAPP86  | +                             | 12366          | AWY11063.1 putative replicase [Nora virus]                                                   | 98.7       | 0.00E+00 |
| k119_19486_len10256_La Jolla virus         | RAPN56  | -                             | 10256          | AWY11061.1 putative polyprotein [La Jolla virus]                                             | 98         | 0.00E+00 |
| k119_20553_len9231_thika virus             | RAPP86  | +                             | 9231           | YP_009140561.1 putative polyprotein [Thika virus]                                            | 96.2       | 0.00E+00 |
| k119_5914_len9220_thika virus              | RAPN73  | -                             | 9220           | YP_009140561.1 putative polyprotein [Thika virus]                                            | 97.1       | 0.00E+00 |
| k119_3227_len6958_Cannin tombus-like virus | RAPN56  | -                             | 6958           | ASN64756.1 putative RNA-dependent RNA polymerase, partial [Leptomonas pyrrhocoris RNA virus] | 44.6       | 1.80E-96 |
| k119_2329_len2049_Cannin tombus-like virus | RAPP88  | +                             | 2049           | ASN64759.1 putative RNA-dependent RNA polymerase, partial [Leptomonas pyrrhocoris RNA virus] | 48.4       | 3.80E-95 |
| k119_4103_len1899_galbut virus             | RAPN73  | -                             | 1899           | AWY11176.1 putative RNA-dependent RNA polymerase [Galbut virus]                              | 96.7       | 0.00E+00 |
| k119_13353_len1510_chaq virus              | RAPN79  | -                             | 1510           | AWY11113.1 hypothetical protein [Chaq virus]                                                 | 85.9       | 1.6E-153 |
| k119_2075_len4120_Lesley reo-like virus    | RAPN73  | -                             | 4120           | APG79144.1 RNA-dependent RNA polymerase [Hubei odonate virus 15]                             | 48.6       | 0.00E+00 |
| k119_10165_len2547_Carmel mito-like virus  | RAPN79  | -                             | 2547           | YP_009329842.1 RNA-dependent RNA polymerase [Hubei narna-like virus 24]                      | 32.7       | 2.0e-76  |
| k119_273_len2671_Araluen mito-like virus   | RAPN5   | -                             | 2671           | QDH87474.1 RNA-dependent RNA polymerase, partial [Mitovirus sp.]                             | 40.3       | 8.0E-96  |
| k119_22084_len2612_Araluen mito-like virus | RAPN5   | -                             | 2612           | QDH87474.1 RNA-dependent RNA polymerase, partial [Mitovirus sp.]                             | 43.2       | 2.3E-103 |

|                                            |        |   |      |                                                                  |      |         |
|--------------------------------------------|--------|---|------|------------------------------------------------------------------|------|---------|
| k119_14037_len2615_Araluen mito-like virus | RAPN56 | - | 2615 | QDH87474.1 RNA-dependent RNA polymerase, partial [Mitovirus sp.] | 41.7 | 1.7E-98 |
| k119_14318_len2822_Araluen mito-like virus | RAPN56 | - | 2822 | QDH87474.1 RNA-dependent RNA polymerase, partial [Mitovirus sp.] | 38.1 | 9.7E-92 |
