# Supplementary material for: RNA virome diversity and Wolbachia infection in individual Drosophila simulans flies
Source: bioRxiv or medRxiv preprint supplement (doi:10.1101/2021.05.09.443333), 2021-05-10
Supplement: Supplementary file [file media-1.pdf]

**Figure S1.** Ribosomal and non-ribosomal reads in each sequencing library. (A) Number of ribosomal/non-ribosomal reads within the total number of reads. (B) Percentage of ribosomal/non-ribosomal reads within the total number of reads.

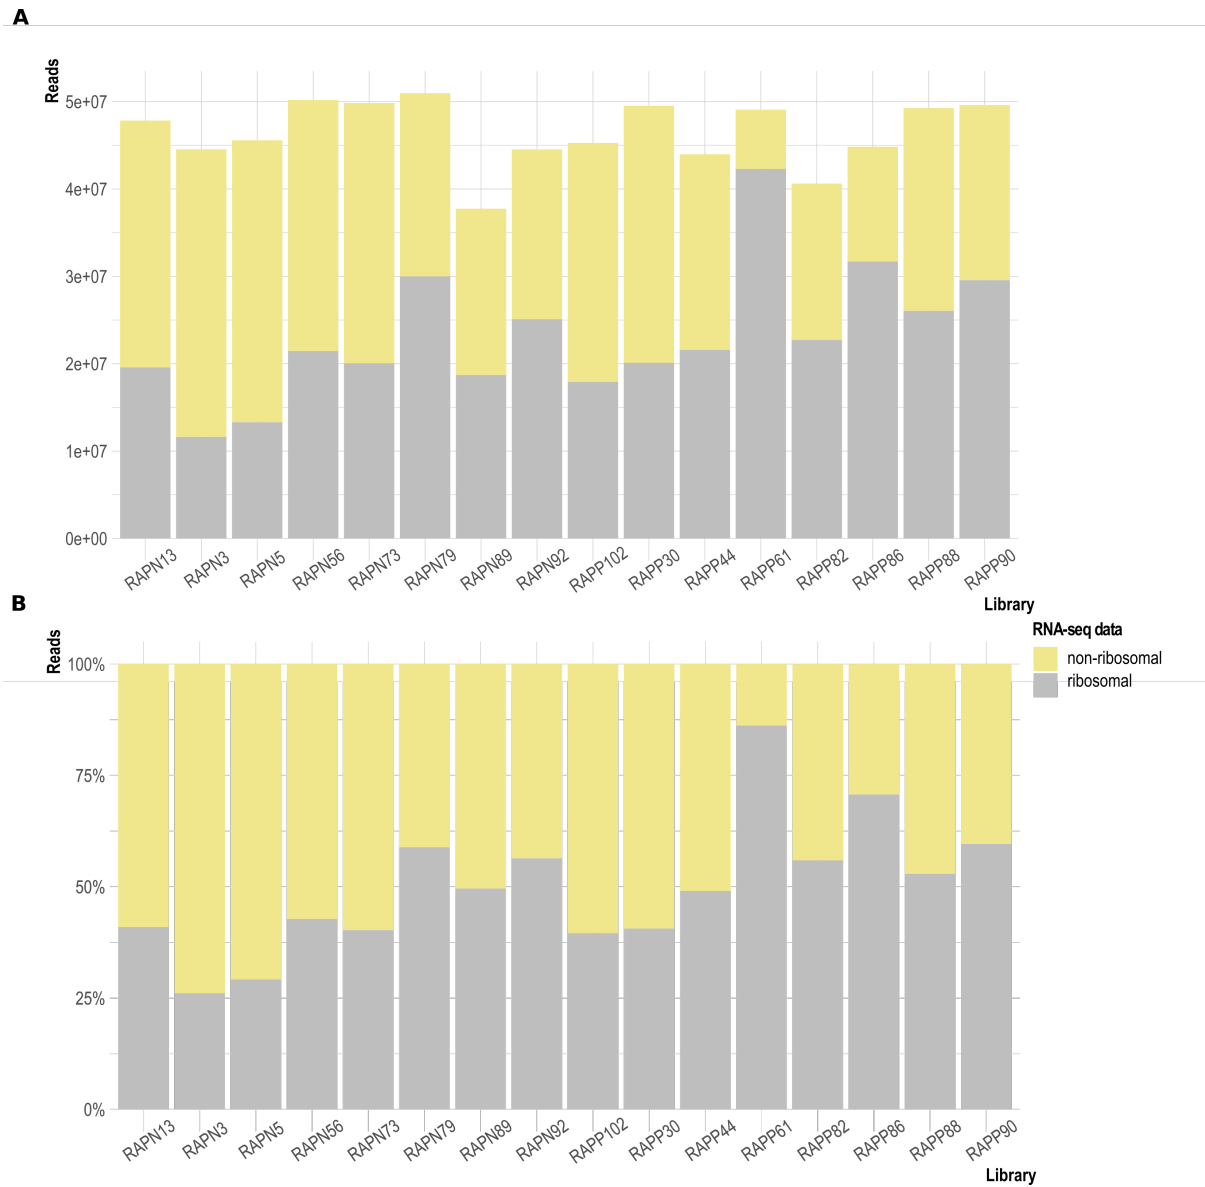

**Table S2.** Abundance values for individual viruses identified in this study across *Wolbachia* infected/uninfected *D. simulans*. The abundance values for a given virus correspond to the number of reads per million mapped reads (RPM). Viruses with RPM values lower than 0.1% of the highest abundance for each virus are shown in grey and assumed to represent index-hopping (and were excluded from additional analyses).

| <i>Wolbachia</i> -negative <i>D. simulans</i> |         |        |        |        |        |        |        |        |
|-----------------------------------------------|---------|--------|--------|--------|--------|--------|--------|--------|
|                                               | RAPN13  | RAPN3  | RAPN5  | RAPN56 | RAPN73 | RAPN79 | RAPN89 | RAPN92 |
| Nora virus (Picorna-like)                     | 8*      | 5*     | 5*     | 7*     | 232346 | 47585  | 5*     | 4*     |
| La Jolla virus (Picorna-like)                 | 0       | 0      | 0      | 378    | 0      | 0      | 0      | 0      |
| Thika virus (Picorna-like)                    | 8*      | 10*    | 14*    | 6*     | 9694   | 6*     | 7*     | 5*     |
| Galbut virus (Partiti-like)                   | 1*      | 9865   | 0      | 9370   | 4264   | 2346   | 11799  | 5650   |
| Chaq virus (Partiti-like)                     | 0       | 20577  | 0      | 15380  | 0      | 4756   | 20293  | 12303  |
| Lesley reo-like virus                         | 0       | 6438   | 0      | 0      | 8749   | 3361   | 1*     | 0      |
| Cannin tombus-like virus                      | 0       | 0      | 0      | 964    | 0      | 0      | 0      | 0      |
| Raeburn bunya-like virus                      | 0       | 0      | 328    | 183    | 0      | 0      | 0      | 0      |
| Carmel mito-like virus                        | 0       | 113    | 0      | 0      | 0      | 86     | 0      | 0      |
| Araluen mito-like virus                       | 0       | 0      | 47     | 118    | 0      | 0      | 0      | 0      |
| <i>Wolbachia</i> -positive <i>D. simulans</i> |         |        |        |        |        |        |        |        |
|                                               | RAPP102 | RAPP30 | RAPP44 | RAPP61 | RAPP82 | RAPP86 | RAPP88 | RAPP90 |
| Nora virus (Picorna-like)                     | 1*      | 1*     | 1*     | 0      | 1*     | 37688  | 1*     | 1*     |
| La Jolla virus (Picorna-like)                 | 0       | 0      | 0      | 0      | 0      | 0      | 0      | 0      |
| Thika virus (Picorna-like)                    | 8*      | 8*     | 7*     | 2*     | 7*     | 4580   | 6*     | 19940  |
| Galbut virus (Partiti-like)                   | 13      | 3920   | 2463   | 1784   | 4708   | 3980   | 3597   | 2412   |
| Chaq virus (Partiti-like)                     | 22      | 0      | 6578   | 13454  | 8881   | 15*    | 10343  | 0      |
| Lesley reo-like virus                         | 0       | 0      | 0      | 0      | 0      | 0      | 0      | 0      |
| Cannin tombus-like virus                      | 0       | 0      | 0      | 0      | 0      | 0      | 24     | 0      |
| Raeburn bunya-like virus                      | 0       | 0      | 0      | 5      | 0      | 132    | 0      | 0      |
| Carmel mito-like virus                        | 0       | 0      | 0      | 0      | 0      | 0      | 0      | 0      |
| Araluen mito-like virus                       | 0       | 0      | 0      | 26     | 0      | 7      | 141    | 0      |

\* RPM values excluded as they likely correspond to index-hopping artefacts during RNA-sequencing.

**Table S3.** List of virus contigs selected for phylogenetic analysis based on levels of sequence similarity.

| <b>Virus</b>                  | <b>N° of contigs (Libraries)</b>                                                                    | <b>% nt identity</b> | <b>% aa identity</b> | <b>Representative sequence (library)*</b>                                                                                                                                                                            |
|-------------------------------|-----------------------------------------------------------------------------------------------------|----------------------|----------------------|----------------------------------------------------------------------------------------------------------------------------------------------------------------------------------------------------------------------|
| Nora virus (Picorna-like)     | 4 (RAPN73, RAPN79, RAPP86)                                                                          | 99.21 - 100          | 99.65 - 100          | k119_3301_len12366_nora_virus (RAPP86)                                                                                                                                                                               |
| La Jolla virus (Picorna-like) | 1 (RAPN56)                                                                                          | n/a                  | n/a                  | k119_19486_len10256_La_Jolla_virus (RAPN56)                                                                                                                                                                          |
| Thika virus (Picorna-like)    | 3 (RAPN73, RAPP86, RAPP90)                                                                          | 91.90-99.99          | 96.15 - 99.97        | k119_20553_len9231_thika_virus (RAPP86),<br>k119_5914_len9220_thika_virus (RAPN73)                                                                                                                                   |
| Cannin tombus-like virus      | 3 (RAPN56, RAPP88)                                                                                  | 94.34 - 99.27        | 87.44 - 99.41        | k119_2329_len2049_cannin tombus-like virus (RAPP88),<br>k119_3227_len6958_cannin tombus-like virus (RAPN56)                                                                                                          |
| Galbut virus (Partiti-like)   | 14 (RAPP30, RAPP44, RAPP61, RAPP82, RAPP86, RAPP88, RAPP90, RAPP102, RAPN73)                        | 96.75-100            | 98.71-100            | k119_4103_len1899_galbut_virus (RAPN73)                                                                                                                                                                              |
| Chaq virus (Unclassified)     | 12 (RAPN3, RAPN56, RAPN56, RAPN79, RAPN89, RAPN92, RAPP102, RAPP44, RAPP61, RAPP82, RAPP86, RAPP88) | 84.48-100            | 98.49-99.69          | k119_13353_len1510_chaq_virus (RAPN79)                                                                                                                                                                               |
| Carmel mito-like virus        | 2 (RAPN3, RAPN79)                                                                                   | 98.63                | 99.27                | k119_10165_len2547_carmel mito-like virus (RAPN79)                                                                                                                                                                   |
| Araluen mito-like virus       | RAPP61, RAPP86, RAPP88, RAPN5, RAPN56                                                               | 39.44-100            | 33.37-98.57          | k119_14037_len2615_araluen mito-like virus (RAPN56),<br>k119_22084_len2612_araluen mito-like virus (RAPN5), k119_14318_len2822_araluen mito-like virus (RAPN56),<br>k119_273_len2671_araluen mito-like virus (RAPN5) |
| Lesley reo-like virus         | 3 (RAPN3, RAPN73, RAPN79)                                                                           | 99.55 - 99.83        | 88.62 - 99.85        | k119_2075_len4120_lesley reo-like virus (RAPN73)                                                                                                                                                                     |
| Raeburn bunya-like virus      | 3 (RAPN5, RAPN56, RAPP86)                                                                           | 99.40-99.56          | 99.40-99.54          | k119_6166_len6778_raeburn bunya-like virus (RAPN5)                                                                                                                                                                   |

**Table S4.** Summary of sequence similarity searches for the total of virus contigs against the NCBI non-redundant database.

| Query sequence                             | Library | <i>Wolbachia</i><br>infection | Length (nt) | Best match against the BLAST/nr database                                                     | Similarity | e-value  |
|--------------------------------------------|---------|-------------------------------|-------------|----------------------------------------------------------------------------------------------|------------|----------|
| k119_18666_len12382_nora virus             | RAPN79  | -                             | 12382       | AWY11063.1 putative replicase [Nora virus]                                                   | 98.7       | 0.00E+00 |
| k119_2699_len5328_nora virus               | RAPN73  | -                             | 5328        | AKH67631.1 replication polyprotein [Nora virus]                                              | 98.9       | 0.00E+00 |
| k119_3301_len12366_nora virus              | RAPP86  | +                             | 12366       | AWY11063.1 putative replicase [Nora virus]                                                   | 98.7       | 0.00E+00 |
| k119_7728_len7167_nora virus               | RAPN73  | -                             | 7167        | AWY11063.1 putative replicase [Nora virus]                                                   | 98.6       | 0.00E+00 |
| k119_19486_len10256_La Jolla virus         | RAPN56  | -                             | 10256       | AWY11061.1 putative polyprotein [La Jolla virus]                                             | 98         | 0.00E+00 |
| k119_5105_len9362_thika virus              | RAPP90  | +                             | 9362        | YP_009140561.1 putative polyprotein [Thika virus]                                            | 96.2       | 0.00E+00 |
| k119_20553_len9231_thika virus             | RAPP86  | +                             | 9231        | YP_009140561.1 putative polyprotein [Thika virus]                                            | 96.2       | 0.00E+00 |
| k119_5914_len9220_thika virus              | RAPN73  | -                             | 9220        | YP_009140561.1 putative polyprotein [Thika virus]                                            | 97.1       | 0.00E+00 |
| k119_6595_len6974_Cannin tombus-like virus | RAPN56  | -                             | 6974        | ASN64759.1 putative RNA-dependent RNA polymerase, partial [Leptomonas pyrrhocoris RNA virus] | 48.4       | 1.30E-94 |
| k119_3227_len6958_Cannin tombus-like virus | RAPN56  | -                             | 6958        | ASN64756.1 putative RNA-dependent RNA polymerase, partial [Leptomonas pyrrhocoris RNA virus] | 44.6       | 1.80E-96 |
| k119_2329_len2049_Cannin tombus-like virus | RAPP88  | +                             | 2049        | ASN64759.1 putative RNA-dependent RNA polymerase, partial [Leptomonas pyrrhocoris RNA virus] | 48.4       | 3.80E-95 |
| k119_14665_len1835_galbut virus            | RAPP30  | +                             | 1835        | AWY11176.1 putative RNA-dependent RNA polymerase [Galbut virus]                              | 97         | 0.00E+00 |
| k119_7000_len1801_galbut virus             | RAPN79  | -                             | 1801        | AWY11176.1 putative RNA-dependent RNA polymerase [Galbut virus]                              | 96.1       | 0.00E+00 |
| k119_15592_len2183_galbut virus            | RAPN56  | -                             | 2183        | AWY11176.1 putative RNA-dependent RNA polymerase [Galbut virus]                              | 96.1       | 0.00E+00 |
| k119_17720_len1823_galbut virus            | RAPP88  | +                             | 1823        | AWY11176.1 putative RNA-dependent RNA polymerase [Galbut virus]                              | 96.1       | 0.00E+00 |
| k119_4103_len1899_galbut virus             | RAPN73  | -                             | 1899        | AWY11176.1 putative RNA-dependent RNA polymerase [Galbut virus]                              | 96.7       | 0.00E+00 |

|                                 |         |   |      |                                                                 |      |          |
|---------------------------------|---------|---|------|-----------------------------------------------------------------|------|----------|
| k119_17804_len1790_galbut virus | RAPN89  | - | 1790 | AWY11176.1 putative RNA-dependent RNA polymerase [Galbut virus] | 96.1 | 0.00E+00 |
| k119_21494_len1682_galbut virus | RAPP86  | + | 1682 | AWY11176.1 putative RNA-dependent RNA polymerase [Galbut virus] | 96.9 | 0.00E+00 |
| k119_18395_len1758_galbut virus | RAPP82  | + | 1758 | AWY11176.1 putative RNA-dependent RNA polymerase [Galbut virus] | 96.3 | 0.00E+00 |
| k119_15212_len1735_galbut virus | RAPP61  | + | 1735 | AWY11176.1 putative RNA-dependent RNA polymerase [Galbut virus] | 96.1 | 0.00E+00 |
| k119_16819_len1733_galbut virus | RAPP44  | + | 1733 | AWY11176.1 putative RNA-dependent RNA polymerase [Galbut virus] | 95.9 | 0.00E+00 |
| k119_15935_len1648_galbut virus | RAPP102 | + | 1648 | AWY11176.1 putative RNA-dependent RNA polymerase [Galbut virus] | 96.3 | 0.00E+00 |
| k119_3037_len1672_galbut virus  | RAPP90  | + | 1672 | AWY11176.1 putative RNA-dependent RNA polymerase [Galbut virus] | 96.1 | 0.00E+00 |
| k119_2472_len1724_galbut virus  | RAPN3   | - | 1724 | AWY11176.1 putative RNA-dependent RNA polymerase [Galbut virus] | 96.1 | 0.00E+00 |
| k119_14538_len1827_galbut virus | RAPN92  | - | 1827 | AWY11176.1 putative RNA-dependent RNA polymerase [Galbut virus] | 96.3 | 0.00E+00 |
| k119_21572_len1547_chaq virus   | RAPN3   | - | 1547 | AWY11113.1 hypothetical protein [Chaq virus]                    | 86.2 | 3.7E-154 |
| k119_1063_len1169_chaq virus    | RAPN56  | - | 1169 | AWY11113.1 hypothetical protein [Chaq virus]                    | 87   | 2.8E-122 |
| k119_6487_len519_chaq virus     | RAPN56  | - | 519  | AWY11113.1 hypothetical protein [Chaq virus]                    | 85.7 | 4.2E-41  |
| k119_13353_len1510_chaq virus   | RAPN79  | - | 1510 | AWY11113.1 hypothetical protein [Chaq virus]                    | 85.9 | 1.6E-153 |
| k119_1562_len1480_chaq virus    | RAPN89  | - | 1480 | AWY11113.1 hypothetical protein [Chaq virus]                    | 85.9 | 5.9E-153 |
| k119_12859_len1545_chaq virus   | RAPN92  | - | 1545 | AWY11113.1 hypothetical protein [Chaq virus]                    | 85.9 | 1.6E-153 |
| k119_15738_len1430_chaq virus   | RAPP102 | + | 1430 | AWY11113.1 hypothetical protein [Chaq virus]                    | 85.6 | 5.7E-153 |
| k119_9647_len1467_chaq virus    | RAPP44  | + | 1467 | AWY11113.1 hypothetical protein [Chaq virus]                    | 85.9 | 9.0E-154 |
| k119_18560_len1471_chaq virus   | RAPP61  | + | 1471 | AWY11113.1 hypothetical protein [Chaq virus]                    | 86.2 | 3.1E-154 |
| k119_17462_len1474_chaq virus   | RAPP82  | + | 1474 | AWY11113.1 hypothetical protein [Chaq virus]                    | 86.2 | 3.1E-154 |

|                                             |        |   |      |                                                                                         |      |           |
|---------------------------------------------|--------|---|------|-----------------------------------------------------------------------------------------|------|-----------|
| k119_4913_len1396_chaq virus                | RAPP86 | + | 1396 | AWY11113.1 hypothetical protein [Chaq virus]                                            | 85.6 | 2.7E-152  |
| k119_2052_len1639_chaq virus                | RAPP88 | + | 1639 | AWY11113.1 hypothetical protein [Chaq virus]                                            | 85.6 | 4.7E-151  |
| k119_13097_len4222_Lesley reo-like virus    | RAPN79 | - | 4222 | APG79144.1 RNA-dependent RNA polymerase [Hubei odonate virus 15]                        | 48.6 | 0.00E+00  |
| k119_6812_len4171_Lesley reo-like virus     | RAPN3  | - | 4171 | APG79144.1 RNA-dependent RNA polymerase [Hubei odonate virus 15]                        | 48.6 | 0.00E+00  |
| k119_2075_len4120_Lesley reo-like virus     | RAPN73 | - | 4120 | APG79144.1 RNA-dependent RNA polymerase [Hubei odonate virus 15]                        | 48.6 | 0.00E+00  |
| k119_3302_len2571_Carmel mito-like virus    | RAPN3  | - | 2571 | YP_009329842.1 RNA-dependent RNA polymerase [Hubei narna-like virus 24]                 | 32.6 | 3.80E-76  |
| k119_10165_len2547_Carmel mito-like virus   | RAPN79 | - | 2547 | YP_009329842.1 RNA-dependent RNA polymerase [Hubei narna-like virus 24]                 | 32.7 | 2.0e-76   |
| k119_6166_len6778_Raeburn bunya-like virus  | RAPN5  | - | 6778 | AUF41956.1 RNA-dependent RNA polymerase [Phytomonas sp. TCC231 leishbunyavirus 1]       | 33.8 | 1.50E-225 |
| k119_10640_len6770_Raeburn bunya-like virus | RAPP86 | + | 6770 | AUF41956.1 RNA-dependent RNA polymerase [Phytomonas sp. TCC231 leishbunyavirus 1]       | 33.6 | 3.40E-225 |
| k119_13493_len6778_Raeburn bunya-like virus | RAPN56 | - | 6778 | AUF41956.1 RNA-dependent RNA polymerase [Phytomonas sp. TCC231 leishbunyavirus 1]       | 33.8 | 1.50E-225 |
| k119_18643_len616_Raeburn bunya-like virus  | RAPP61 | + | 616  | ANJ59510.1 putative RNA dependent RNA polymerase [Leptomonas moramango leishbunyavirus] | 50.8 | 5.6E-41   |
| k119_18154_len397_Araluen mito-like virus   | RAPP86 | + | 397  | QDH87577.1 RNA-dependent RNA polymerase [Mitovirus sp.]                                 | 41   | 1.3E-17   |
| k119_18803_len660_Araluen mito-like virus   | RAPP86 | + | 660  | QDH87474.1 RNA-dependent RNA polymerase, partial [Mitovirus sp.]                        | 56.6 | 5.1E-56   |
| k119_2431_len529_Araluen mito-like virus    | RAPP61 | + | 529  | QDH87474.1 RNA-dependent RNA polymerase, partial [Mitovirus sp.]                        | 65.5 | 4.2E-13   |
| k119_4889_len444_Araluen mito-like virus    | RAPP61 | + | 444  | QDH89956.1 RNA-dependent RNA polymerase, partial [Mitovirus sp.]                        | 62.6 | 6.3E-34   |
| k119_7925_len640_Araluen mito-like virus    | RAPP61 | + | 640  | QDH87474.1 RNA-dependent RNA polymerase, partial [Mitovirus sp.]                        | 50.5 | 7.9E-46   |
| k119_11923_len1133_Araluen mito-like virus  | RAPP61 | + | 1133 | QDH87474.1 RNA-dependent RNA polymerase, partial [Mitovirus sp.]                        | 37.7 | 1.7E-35   |

|                                            |        |   |      |                                                                  |       |          |
|--------------------------------------------|--------|---|------|------------------------------------------------------------------|-------|----------|
| k119_910_len407_Araluen mito-like virus    | RAPP88 | + | 407  | QDH89786.1 RNA-dependent RNA polymerase [Mitovirus sp.]          | 43    | 6.8E-11  |
| k119_1774_len2695_Araluen mito-like virus  | RAPP88 | + | 2695 | QDH87474.1 RNA-dependent RNA polymerase, partial [Mitovirus sp.] | 40.1  | 1.2E-95  |
| k119_4605_len1802_Araluen mito-like virus  | RAPP88 | + | 1802 | QDH87474.1 RNA-dependent RNA polymerase, partial [Mitovirus sp.] | 43.3  | 1.9E-68  |
| k119_14272_len692_Araluen mito-like virus  | RAPP88 | + | 692  | QDH86541.1 RNA-dependent RNA polymerase, partial [Mitovirus sp.] | 43    | 1.4E-11  |
| k119_18473_len904_Araluen mito-like virus  | RAPP88 | + | 904  | QDH87474.1 RNA-dependent RNA polymerase, partial [Mitovirus sp.] | 47.1  | 2.4E-64  |
| k119_19278_len2543_Araluen mito-like virus | RAPP88 | + | 2543 | QDH87474.1 RNA-dependent RNA polymerase, partial [Mitovirus sp.] | 43.2  | 1.9E-103 |
| k119_19907_len1133_Araluen mito-like virus | RAPP88 | + | 1133 | QDH87474.1 RNA-dependent RNA polymerase, partial [Mitovirus sp.] | 35.5  | 1.4E-29  |
| k119_273_len2671_Araluen mito-like virus   | RAPN5  | - | 2671 | QDH87474.1 RNA-dependent RNA polymerase, partial [Mitovirus sp.] | 40.3  | 8.0E-96  |
| k119_2554_len759_Araluen mito-like virus   | RAPN5  | - | 759  | QDH86541.1 RNA-dependent RNA polymerase, partial [Mitovirus sp.] | 46.7  | 8.0E-09  |
| k119_2894_len1507_Araluen mito-like virus  | RAPN5  | - | 1507 | QDH87474.1 RNA-dependent RNA polymerase, partial [Mitovirus sp.] | 33.3  | 4.4E-43  |
| k119_5165_len1639_Araluen mito-like virus  | RAPN5  | - | 1639 | QDH87474.1 RNA-dependent RNA polymerase, partial [Mitovirus sp.] | 41.15 | 4.2E-79  |
| k119_7808_len326_Araluen mito-like virus   | RAPN5  | - | 326  | QDH89786.1 RNA-dependent RNA polymerase [Mitovirus sp.]          | 42.9  | 2.4E-10  |
| k119_9428_len371_Araluen mito-like virus   | RAPN5  | - | 371  | QDH86541.1 RNA-dependent RNA polymerase, partial [Mitovirus sp.] | 38.9  | 1.4E-06  |
| k119_12924_len1504_Araluen mito-like virus | RAPN5  | - | 1504 | QDH87474.1 RNA-dependent RNA polymerase, partial [Mitovirus sp.] | 46.9  | 8.0E-53  |
| k119_22084_len2612_Araluen mito-like virus | RAPN5  | - | 2612 | QDH87474.1 RNA-dependent RNA polymerase, partial [Mitovirus sp.] | 43.2  | 2.3E-103 |
| k119_495_len2643_Araluen mito-like virus   | RAPN56 | - | 2643 | QDH87474.1 RNA-dependent RNA polymerase, partial [Mitovirus sp.] | 43.4  | 2.7E-104 |
| k119_1684_len2692_Araluen mito-like virus  | RAPN56 | - | 2692 | QDH87474.1 RNA-dependent RNA polymerase, partial [Mitovirus sp.] | 40    | 8.1E-96  |
| k119_14037_len2615_Araluen mito-like virus | RAPN56 | - | 2615 | QDH87474.1 RNA-dependent RNA polymerase, partial [Mitovirus sp.] | 41.7  | 1.7E-98  |
| k119_14318_len2822_Araluen mito-like virus | RAPN56 | - | 2822 | QDH87474.1 RNA-dependent RNA polymerase, partial [Mitovirus sp.] | 38.1  | 9.7E-92  |
